# Supplementary material for: Breed, age, and social environment are associated with personality traits in dogs
Source: PubMed Central journal article supplement — iScience. 2023 Apr 19;26(5):106691. doi: 10.1016/j.isci.2023.106691 (PMC10165416; doi:10.1016/j.isci.2023.106691), 2023-04-19
Supplement: mmc1.pdf [file mmc1.pdf]

iScience, Volume 26

## **Supplemental information**

### **Breed, age, and social environment are associated with personality traits in dogs**

**Milla Salonen, Salla Mikkola, Julia E. Niskanen, Emma Hakanen, Sini Sulkama, Jenni Puurunen, and Hannes Lohi**

**This PDF file includes:**

Supplementary tables (S1 to S12), related to STAR Methods.

Supplementary figures (S1 to S6), related to Table 1 and Figure 1.

Data S1. R Code, related to STAR Methods

**Other Supplementary Materials for this manuscript include the following:**

Supplementary Data S2. Supplementary results consisting of pairwise contrasts between categorical variable levels, related to Table 1.

**Table S1.** Breeds and breed groups, related to STAR Methods.

|                                                                                                                                                                                              |                                                                                                                                                                                                                                                                                                                                                      |                                                                                                                                                                                                                                  |                                                                                                                                                                                                                                                                                                                                                                        |
|----------------------------------------------------------------------------------------------------------------------------------------------------------------------------------------------|------------------------------------------------------------------------------------------------------------------------------------------------------------------------------------------------------------------------------------------------------------------------------------------------------------------------------------------------------|----------------------------------------------------------------------------------------------------------------------------------------------------------------------------------------------------------------------------------|------------------------------------------------------------------------------------------------------------------------------------------------------------------------------------------------------------------------------------------------------------------------------------------------------------------------------------------------------------------------|
| <b>Australian Shepherd</b><br>Australian Shepherd<br>Miniature American Shepherd                                                                                                             | <b>Belgian shepherd dogs</b><br>Groenendael<br>Laekenois<br>Malinois<br>Tervueren                                                                                                                                                                                                                                                                    | <b>Bernese Mountain Dogs</b><br>Appenzell Cattle Dog<br>Bernese Mountain Dog<br>Entlebucher Mountain Dog<br>Greater Swiss Mountain Dog                                                                                           | <b>Bichon type dogs</b><br>Bichon Frise<br>Bolognese<br>Coton de Tulear<br>Havanese<br>Löwchen<br>Maltese<br>Russian Tsvetnaya Bolonka                                                                                                                                                                                                                                 |
| <b>Brachycephalic dogs</b><br>Boston Terrier<br>Bulldog<br>French Bulldog<br>Olde English Bulldogge<br>Pug                                                                                   | <b>Bull type terriers</b><br>Bull Terrier<br>Miniature Bull Terrier<br>Staffordshire Bull Terrier                                                                                                                                                                                                                                                    | <b>Dachshunds</b><br>Miniature Longhaired<br>Miniature Shorthaired<br>Miniature Wirehaired<br>Rabbit Longhaired<br>Rabbit Shorthaired<br>Rabbit Wirehaired<br>Standard Longhaired<br>Standard Shorthaired<br>Standard Wirehaired | <b>English herders</b><br>Australian Cattle Dog<br>Australian Kelpie<br>Australian Koolie<br>Bearded Collie<br>Lancashire Heeler<br>Old English Sheepdog<br>Welsh Sheepdog                                                                                                                                                                                             |
| <b>European sighthounds</b><br>Borzoi<br>Deerhound<br>Greyhound<br>Hungarian Greyhound<br>Irish Wolfhound<br>Italian Sighthound<br>Polish Greyhound<br>Silken Windhound<br>Spanish Greyhound | <b>Fighting dogs</b><br>American Bulldog<br>American Bully<br>American Pit Bull Terrier<br>American Staffordshire Terrier<br>Cane Corso<br>Dogo Argentino<br>Presa Canario                                                                                                                                                                           | <b>German spitz related breeds</b><br>Eurasier<br>Giant Spitz<br>Medium size Spitz<br>Miniature Spitz<br>Japanese Spitz<br>Keeshond<br>Pomeranian<br>Volpino Italiano                                                            | <b>Hunting terriers</b><br>Bedlington Terrier<br>Border Terrier<br>Cairn Terrier<br>Cesky Terrier<br>Dandie Dinmont Terrier<br>Fox Terrier Smooth<br>Fox Terrier Wire<br>German Hunting Terrier<br>Glen of Imaal Terrier<br>Lakeland Terrier<br>Norfolk Terrier<br>Norwich Terrier<br>Scottish Terrier<br>Skye Terrier<br>Welsh Terrier<br>West Highland White Terrier |
| <b>Asian primitive breeds</b><br>Akita<br>American Akita<br>Chow Chow<br>Hokkaido<br>Kai<br>Kishu<br>Korea Jindo Dog<br>Shar Pei<br>Shiba<br>Shikoku<br>Tosa                                 | <b>Livestock guardian dogs</b><br>Boerboel<br>Catalan Sheepdog<br>Caucasian Shepherd Dog<br>Central Asian Shepherd Dog<br>Estrela Mountain Dog<br>Maremma Sheepdog<br>Pyrenean Mastiff<br>Pyrenean Mountain Dog<br>Sarplaninac<br>Slovakian Chuvach<br>South Russian Ovcharka<br>Spanish Mastiff<br>Tatra Shepherd Dog<br>Tibetan Mastiff<br>Tornjak | <b>Mastiff type dogs</b><br>Boxer<br>Broholmer<br>Bullmastiff<br>Dogue de Bordeaux<br>Great Dane<br>Landseer<br>Leonberger<br>Mastiff<br>Newfoundland<br>Saint Bernard Longhaired<br>Saint Bernard Shorthaired                   | <b>Middle European herders</b><br>Beauceron<br>Bouvier des Ardennes<br>Bouvier des Flandres<br>Briard<br>Croatian Sheepdog<br>Mudi<br>Picardy Sheepdog<br>Polish Lowland Sheepdog<br>Portuguese Sheepdog<br>Puli<br>Pumi<br>Pyrenean Sheepdog<br>Longhaired<br>Pyrenean Sheepdog Smooth<br>Faced                                                                       |
| <b>Middle European utility dogs</b><br>Bohemian Shepherd<br>Ceskoslovensky Vlca<br>Dalmatian<br>Dobermann                                                                                    | <b>Northern companion spitzes</b><br>Icelandic Sheepdog<br>Norwegian Buhund<br>Swedish Lapphund<br>Swedish Vallhund                                                                                                                                                                                                                                  | <b>Northern hunting spitzes</b><br>East Siberian Laika<br>Finnish Spitz<br>Karelian Bear Dog<br>Norbottenspitz                                                                                                                   | <b>Other breed</b><br>Australian Cobberdog<br>Australian Labradoodle<br>Golden Labrador Retriever<br>Indian Pariah Dog                                                                                                                                                                                                                                                 |

|                                    |                                        |                                 |                                       |
|------------------------------------|----------------------------------------|---------------------------------|---------------------------------------|
| Dutch Shepherd Dog<br>Longhaired   |                                        | Norwegian Elkhound              | Peruvian Hairless Dog Large           |
| Dutch Shepherd Dog<br>Rough haired |                                        | Russian European Laika          | Peruvian Hairless Dog Medium<br>sized |
| Dutch Shepherd Dog<br>Shorthaired  |                                        | Swedish Elkhound                | Peruvian Hairless Dog<br>Miniature    |
| East European Shepherd             |                                        | West Siberian Laika             | Seskar seal dog                       |
| Hovawart                           |                                        |                                 | Unknown breed                         |
| Rottweiler                         |                                        |                                 | Wolfdog                               |
| Saarloos Wolfdog                   |                                        |                                 | Xoloitzcuintle Intermediate           |
| Schipperke                         |                                        |                                 | Xoloitzcuintle Standard               |
| <b>Other companion dogs</b>        | <b>Parson type terriers</b>            | <b>Pinschers/Schnauzers</b>     | <b>Pointers</b>                       |
| Affenpinscher                      | Brazilian Terrier                      | Black Russian Terrier           | Blue Picardy Spaniel                  |
| Alaskan Klee Kai                   | Parson Russell Terrier                 | German Pinscher                 | Braque du Bourbonnais                 |
| Australian Silky Terrier           | Working Jack Russell<br>Terrier        | Giant Schnauzer                 | Brittany                              |
| Cavalier King Charles<br>Spaniel   |                                        | Schnauzer                       | Deutsch Drahthaar                     |
| Griffon Belge                      |                                        |                                 | Deutsch Kurzhaar                      |
| Griffon Bruxellois                 |                                        |                                 | Deutsch Langhaar                      |
| King Charles Spaniel               |                                        |                                 | English Pointer                       |
| Kromfohrlander                     |                                        |                                 | English Setter                        |
| Lhasa Apso                         |                                        |                                 | Gordon Setter                         |
| Papillon                           |                                        |                                 | Irish Red and White Setter            |
| Pekingese                          |                                        |                                 | Irish Red Setter                      |
| Petit Brabancon                    |                                        |                                 | Large Munsterlander                   |
| Phalene                            |                                        |                                 | Old Danish Pointer                    |
| Shih Tzu                           |                                        |                                 | Pont Audemer Spaniel                  |
| Tibetan Spaniel                    |                                        |                                 | Portuguese Pointer                    |
| Tibetan Terrier                    |                                        |                                 | Small Munsterlander                   |
|                                    |                                        |                                 | Spinone Italiano                      |
|                                    |                                        |                                 | Stabyhoun                             |
|                                    |                                        |                                 | Vizsla                                |
|                                    |                                        |                                 | Weimaraner Longhaired                 |
|                                    |                                        |                                 | Weimaraner Shorthaired                |
|                                    |                                        |                                 | Wirehaired Pointing Griffon           |
|                                    |                                        |                                 | Wirehaired Vizsla                     |
| <b>Poodles</b>                     | <b>Primitive sighthounds</b>           | <b>Retrievers/Flushing Dogs</b> | <b>Scenthounds</b>                    |
| Poodle Medium                      | Afghan Hound                           | American Cocker Spaniel         | American Foxhound                     |
| Poodle Miniature                   | Andalusian Hound                       | American Water Spaniel          | Barak Hound                           |
| Poodle Standard                    | Basenji                                | Barbet                          | Basset Fauve de Bretagne              |
| Poodle Toy                         | Cirneco dell'Etna                      | Chesapeake Bay Retriever        | Basset Hound                          |
|                                    | Ibizan Hound Smooth                    | Clumber Spaniel                 | Bavarian Mountain Hound               |
|                                    | Ibizan Hound Wire                      | Curly Coated Retriever          | Beagle                                |
|                                    | Pharaoh Hound                          | English Cocker Spaniel          | Bracco Italiano                       |
|                                    | Podenco Orito                          | English Springer Spaniel        | Braque d'Auvergne                     |
|                                    | Portuguese Podengo Medium              | Field Spaniel                   | Drever                                |
|                                    | Portuguese Podengo Medium<br>Smooth    | Flat Coated Retriever           | Estonian Hound                        |
|                                    | Portuguese Podengo Medium<br>Wire      | Irish Water Spaniel             | Finnish Hound                         |
|                                    | Portuguese Podengo Miniature<br>Smooth | Kooikerhondje                   | Grand Basset Griffon Vendeen          |
|                                    | Portuguese Podengo Miniature<br>Wire   | Portuguese Water Dog            | Griffon Fauve de Bretagne             |
|                                    | Ratonero Bodeguero Andaluz             | Welsh Springer Spaniel          | Istrian Coarse-haired Hound           |
|                                    | Rhodesian Ridgeback                    |                                 | Italian Rough Haired Segugio          |
|                                    | Saluki                                 |                                 | Italian Short Haired Segugio          |
|                                    | Sloughi                                |                                 | Petit Basset Griffon Vendeen          |
|                                    | Thai Ridgeback                         |                                 | Plott                                 |
|                                    |                                        |                                 | Posavatz Hound                        |
|                                    |                                        |                                 | Russian Hound                         |
|                                    |                                        |                                 | Swiss Hound                           |
| <b>Sled dogs</b>                   | <b>Teacup dogs</b>                     | <b>Welsh Corgis</b>             | <b>Yard terriers</b>                  |
| Alaskan Husky                      | Biewer Terrier                         | Welsh Corgi Cardigan            | Airedale Terrier                      |

|                          |                               |                                    |                                   |
|--------------------------|-------------------------------|------------------------------------|-----------------------------------|
| Alaskan Malamute         | Chihuahua                     | Welsh Corgi Pembroke               | American Hairless Terrier         |
| Chukotka Sled Dog        | Chihuahua Longhaired          |                                    | Australian Terrier                |
| Greenland Dog            | Chihuahua Smooth haired       |                                    | Danish Swedish Farmdog            |
| Samoyed                  | Russian Toy Dog Longhaired    |                                    | English Toy Terrier               |
| Siberian Husky           | Russian Toy Dog Smooth haired |                                    | Irish Soft Coated Wheaten Terrier |
| Yakutian Laika           | Yorkshire Terrier             |                                    | Irish Terrier                     |
|                          |                               |                                    | Kerry Blue Terrier                |
|                          |                               |                                    | Manchester Terrier                |
|                          |                               |                                    | Prague Ratter                     |
|                          |                               |                                    | Rat Terrier                       |
|                          |                               |                                    | Tenterfield Terrier               |
|                          |                               |                                    | Toy Fox Terrier                   |
| <b>Individual Breeds</b> | Jack Russell Terrier          | Mixed breed                        | Smooth Collie                     |
| Border Collie            | Labrador Retriever            | Nova Scotia Duck Tolling Retriever | Spanish Water Dog                 |
| Chinese Crested Dog      | Lagotto Romagnolo             |                                    | Whippet                           |
| Finnish Lapphund         | Lapponian Herder              | Rough Collie                       | White Swiss Shepherd Dog          |
| German Shepherd Dog      | Miniature Pinscher            | Schapendoes                        |                                   |
| Golden Retriever         | Miniature Schnauzer           | Shetland Sheepdog                  |                                   |

**Table S2.** Variables derived from the dog personality and unwanted behaviour questionnaire, related to STAR Methods.

| <b>Variable</b>                           | <b>Description</b>                                                                                                                                                                       | <b>Levels</b>                                                                                                                                                   |
|-------------------------------------------|------------------------------------------------------------------------------------------------------------------------------------------------------------------------------------------|-----------------------------------------------------------------------------------------------------------------------------------------------------------------|
| Insecurity factor score                   | Continuous variable. Factor score of personality trait Insecurity, with higher score indicating higher insecurity.                                                                       | Continuous                                                                                                                                                      |
| Training focus factor score               | Continuous variable. Factor score of personality trait Training focus, with higher score indicating higher training focus.                                                               | Continuous                                                                                                                                                      |
| Energy factor score                       | Continuous variable. Factor score of personality trait Energy, with higher score indicating higher activity/playfulness.                                                                 | Continuous                                                                                                                                                      |
| Aggressiveness/ dominance factor score    | Continuous variable. Factor score of personality trait Aggressiveness/dominance, with higher score indicating higher aggressiveness/dominance.                                           | Continuous                                                                                                                                                      |
| Human sociability factor score            | Continuous variable. Factor score of personality trait Human sociability, with higher score indicating higher human sociability.                                                         | Continuous                                                                                                                                                      |
| Dog sociability factor score              | Continuous variable. Factor score of personality trait Dog sociability, with higher score indicating higher dog sociability.                                                             | Continuous                                                                                                                                                      |
| Perseverance factor score                 | Continuous variable. Factor score of personality trait Perseverance, with higher score indicating higher perseverance.                                                                   | Continuous                                                                                                                                                      |
| Sex                                       | Categorical variable. Sex of the dog.                                                                                                                                                    | Female<br>Male                                                                                                                                                  |
| Age when personality section was answered | Continuous variable. Calculated by subtracting the dog's date of birth from the answering date and converting this to years.                                                             | Continuous, in years                                                                                                                                            |
| Breed/breed group                         | Categorical variable. Breed was indicated by the owner and some breeds were grouped into breed groups based on genetic relatedness, use of the breed and known behavioural similarities. | See Supplementary Table S1                                                                                                                                      |
| Sterilisation status                      | Categorical variable. Owners indicated whether their dog was neutered.                                                                                                                   | Intact<br>Neutered                                                                                                                                              |
| Main reason for ownership/use of the dog  | Categorical variable. Owners selected the main reason/use of their dog, indicating their perception of the dog.                                                                          | Family member<br>Dog hobbies/work<br>Pet                                                                                                                        |
| Obtained from                             | Categorical variable. Owners indicated where they obtained their dog from.                                                                                                               | The dog was born at the owner's home<br>From a breeder<br>Rescue/previous owner: Dog is a rescue/stray or came from a previous owner or obtained from elsewhere |
| Level of socialisation                    | Categorical variable. We first performed PCA with polychoric correlation matrix, no rotation and Thurstone scoring method. Then we                                                       | Q1 = lowest<br>Q2<br>Q3                                                                                                                                         |

|                                           |                                                                                                                                                                                                                                                                                   |                                                                                                                                                                                                                                                                                                                                     |
|-------------------------------------------|-----------------------------------------------------------------------------------------------------------------------------------------------------------------------------------------------------------------------------------------------------------------------------------|-------------------------------------------------------------------------------------------------------------------------------------------------------------------------------------------------------------------------------------------------------------------------------------------------------------------------------------|
|                                           | divided this continuous variable into quartiles.                                                                                                                                                                                                                                  | Q4 = highest<br>Obtained after the socialisation period                                                                                                                                                                                                                                                                             |
| Living place                              | Categorical variable. Owners indicated their living environment.                                                                                                                                                                                                                  | Rural: In a rural area<br>Urban: In a city center or in a city/town, but outside the center                                                                                                                                                                                                                                         |
| Other dogs in the household when acquired | Categorical variable. Owners indicated whether they had other dogs (living in the same household) when they acquired this particular dog.                                                                                                                                         | No<br>Yes                                                                                                                                                                                                                                                                                                                           |
| Other dogs in the household currently     | Categorical variable. Owners indicated whether they currently have other dogs living in the same household with this dog.                                                                                                                                                         | No<br>Yes                                                                                                                                                                                                                                                                                                                           |
| Daily exercise                            | Categorical variable. Owners were asked to consider how many hours/minutes they walk their dog during a typical day.                                                                                                                                                              | Under 1 hour<br>1-2 hours<br>2-3 hours<br>Over 3 hours                                                                                                                                                                                                                                                                              |
| Frequency of hobbies                      | Categorical variable. Owners indicated the frequency of hobbies both at home and outside of their home (e.g. with an instructor). The frequency of hobbies variable is a combination of these questions. Most common dog hobbies were dog shows, agility, and obedience training. | Never/no hobby: Never or does not have hobbies<br>Infrequent: Infrequent frequency of hobbies either at home or outside, or both<br>Active only outside: High frequency of hobbies, but only outside of home<br>Active only at home: High frequency of hobbies, but only outside of home<br>Active: Active both at home and outside |
| Average time spent alone                  | Categorical variable. Owners stated how much time their dog spends alone (without people present) during a typical working day.                                                                                                                                                   | Under 1 hour<br>1-3 hours<br>3-6 hours<br>6-8 hours<br>Over 8 hours                                                                                                                                                                                                                                                                 |
| Life experience of dogs                   | Categorical variable. Owners chose whether they had family dogs in childhood/adolescence.                                                                                                                                                                                         | Dogs in the family from/in childhood<br>Dogs in the family since adolescent years<br>First dog in adulthood, no dogs in the family before that                                                                                                                                                                                      |
| Dog experience                            | Categorical variable. Owners indicated how many dogs they had had living in their household.                                                                                                                                                                                      | This dog is the owner's first dog<br>This dog is the owner's second dog<br>This dog is the owner's third to fifth dog<br>This dog is the owner's over fifth dog                                                                                                                                                                     |

**Table S3.** Socialisation item loadings, related to STAR Methods.

| <b>Item</b>                        | <b>Loading</b> |
|------------------------------------|----------------|
| Met unfamiliar men                 | <b>0.83</b>    |
| Met unfamiliar women               | <b>0.85</b>    |
| Met unfamiliar children            | <b>0.46</b>    |
| Met unfamiliar dogs                | <b>0.71</b>    |
| Visited city center                | <b>0.64</b>    |
| Travelled by car                   | <b>0.39</b>    |
| Travelled by public transportation | <b>0.44</b>    |



**Table S4.** Results of model validation in trait Insecurity, related to STAR Methods. Chosen explanatory variables are in bold.

| <b>Insecurity</b>                               | <b>% present in random subsampling</b> | <b>% present in repeated train-test</b> | <b>relative influence</b> |
|-------------------------------------------------|----------------------------------------|-----------------------------------------|---------------------------|
| <b>sex</b>                                      | base                                   | base                                    | 3.00                      |
| <b>age</b>                                      | base                                   | base                                    | 14.60                     |
| <b>breed/breed group</b>                        | base                                   | base                                    | 33.60                     |
| <b>level of socialisation</b>                   | 100                                    | 100                                     | 14.22                     |
| <b>sterilisation status</b>                     | 100                                    | 100                                     | 8.77                      |
| <b>dog experience</b>                           | 80                                     | 100                                     | 11.34                     |
| <b>main reason/use</b>                          | 70                                     | 100                                     | 3.94                      |
| <b>frequency of hobbies</b>                     | 60                                     | 100                                     | 4.69                      |
| living place                                    | 30                                     | 100                                     | 1.06                      |
| other dogs when acquired                        | 30                                     | 100                                     | 0.67                      |
| other dogs currently                            | 20                                     | 100                                     | 0.71                      |
| daily exercise                                  | 30                                     | 90                                      | 2.37                      |
| dog obtained from                               | 10                                     | 70                                      | 1.03                      |
| average time spent alone                        | 10                                     | 0                                       | 0.00                      |
| life experience of dogs                         | 10                                     | 0                                       | 0.00                      |
| sex * sterilisation status                      | 20                                     | 90                                      |                           |
| age * sex                                       | 10                                     | 10                                      |                           |
| life experience of dogs * dog experience        | 10                                     | 0                                       |                           |
| main reason/use * frequency of hobbies          | 10                                     | 0                                       |                           |
| daily exercise * frequency of hobbies           | 0                                      | 0                                       |                           |
| living place * daily exercise                   | 0                                      | 0                                       |                           |
| other dogs currently * average time spent alone | 0                                      | 0                                       |                           |
| other dogs currently * other dogs when acquired | 0                                      | 0                                       |                           |

**Table S5.** Results of model validation in trait Training focus, related to STAR Methods. Chosen explanatory variables are in bold.

| <b>Training focus</b>                           | <b>% present in random subsampling</b> | <b>% present in repeated train-test</b> | <b>relative influence</b> |
|-------------------------------------------------|----------------------------------------|-----------------------------------------|---------------------------|
| <b>sex</b>                                      | base                                   | base                                    | 2.20                      |
| <b>age</b>                                      | base                                   | base                                    | 34.68                     |
| <b>breed/breed group</b>                        | base                                   | base                                    | 24.27                     |
| <b>frequency of hobbies</b>                     | 80                                     | 100                                     | 11.63                     |
| <b>daily exercise</b>                           | 70                                     | 100                                     | 4.29                      |
| <b>level of socialisation</b>                   | 60                                     | 100                                     | 8.83                      |
| <b>sterilisation status</b>                     | 60                                     | 100                                     | 3.22                      |
| <b>average time spent alone</b>                 | 50                                     | 100                                     | 2.92                      |
| <b>dog experience</b>                           | 50                                     | 100                                     | 2.88                      |
| main reason/use                                 | 30                                     | 100                                     | 3.34                      |
| dog obtained from                               | 40                                     | 90                                      | 1.32                      |
| living place                                    | 20                                     | 40                                      | 0.42                      |
| other dogs when acquired                        | 10                                     | 0                                       | 0.00                      |
| other dogs currently                            | 10                                     | 0                                       | 0.00                      |
| life experience of dogs                         | 0                                      | 0                                       | 0.00                      |
| living place * daily exercise                   | 10                                     | 0                                       |                           |
| main reason/use * frequency of hobbies          | 0                                      | 10                                      |                           |
| sex * sterilisation status                      | 0                                      | 0                                       |                           |
| daily exercise * frequency of hobbies           | 0                                      | 0                                       |                           |
| age * sex                                       | 0                                      | 0                                       |                           |
| life experience of dogs * dog experience        | 0                                      | 0                                       |                           |
| other dogs currently * average time spent alone | 0                                      | 0                                       |                           |
| other dogs currently * other dogs when acquired | 0                                      | 0                                       |                           |

**Table S6.** Results of model validation in trait Energy, related to STAR Methods. Chosen explanatory variables are in bold.

| <b>Energy</b>                                   | <b>% present in random subsampling</b> | <b>% present in repeated train-test</b> | <b>relative influence</b> |
|-------------------------------------------------|----------------------------------------|-----------------------------------------|---------------------------|
| <b>sex</b>                                      | base                                   | base                                    | 0.51                      |
| <b>age</b>                                      | base                                   | base                                    | 44.27                     |
| <b>breed/breed group</b>                        | base                                   | base                                    | 46.82                     |
| <b>frequency of hobbies</b>                     | 80                                     | 100                                     | 2.31                      |
| <b>other dogs when acquired</b>                 | 60                                     | 100                                     | 2.14                      |
| other dogs currently                            | 40                                     | 100                                     | 1.35                      |
| average time spent alone                        | 30                                     | 90                                      | 0.57                      |
| daily exercise                                  | 10                                     | 20                                      | 0.24                      |
| dog experience                                  | 10                                     | 10                                      | 0.15                      |
| living place                                    | 10                                     | 0                                       | 0.00                      |
| level of socialisation                          | 0                                      | 90                                      | 0.87                      |
| main reason/use                                 | 0                                      | 90                                      | 0.59                      |
| dog obtained from                               | 0                                      | 20                                      | 0.15                      |
| life experience of dogs                         | 0                                      | 0                                       | 0.03                      |
| sterilisation status                            | 0                                      | 0                                       | 0.00                      |
| other dogs currently * other dogs when acquired | 40                                     | 90                                      |                           |
| sex * sterilisation status                      | 0                                      | 0                                       |                           |
| daily exercise * frequency of hobbies           | 0                                      | 0                                       |                           |
| age * sex                                       | 0                                      | 0                                       |                           |
| living place * daily exercise                   | 0                                      | 0                                       |                           |
| life experience of dogs * dog experience        | 0                                      | 0                                       |                           |
| main reason/use * frequency of hobbies          | 0                                      | 0                                       |                           |
| other dogs currently * average time spent alone | 0                                      | 0                                       |                           |

**Table S7.** Results of model validation in trait Aggressiveness/dominance, related to STAR Methods. Chosen explanatory variables are in bold.

| <b>Aggressiveness/dominance</b>                 | <b>% present in random subsampling</b> | <b>% present in repeated train-test</b> | <b>relative influence</b> |
|-------------------------------------------------|----------------------------------------|-----------------------------------------|---------------------------|
| <b>sex</b>                                      | base                                   | base                                    | 6.06                      |
| <b>age</b>                                      | base                                   | base                                    | 34.78                     |
| <b>breed/breed group</b>                        | base                                   | base                                    | 55.04                     |
| <b>level of socialisation</b>                   | 50                                     | 100                                     | 2.64                      |
| dog obtained from                               | 30                                     | 50                                      | 0.18                      |
| living place                                    | 20                                     | 50                                      | 0.15                      |
| other dogs when acquired                        | 20                                     | 50                                      | 0.00                      |
| sterilisation status                            | 10                                     | 50                                      | 0.37                      |
| main reason/use                                 | 10                                     | 60                                      | 0.12                      |
| average time spent alone                        | 10                                     | 10                                      | 0.11                      |
| other dogs currently                            | 10                                     | 10                                      | 0.00                      |
| daily exercise                                  | 0                                      | 50                                      | 0.33                      |
| dog experience                                  | 0                                      | 10                                      | 0.16                      |
| life experience of dogs                         | 0                                      | 10                                      | 0.06                      |
| frequency of hobbies                            | 0                                      | 0                                       | 0.00                      |
| age * sex                                       | 10                                     | 0                                       |                           |
| sex * sterilisation status                      | 0                                      | 0                                       |                           |
| daily exercise * frequency of hobbies           | 0                                      | 0                                       |                           |
| living place * daily exercise                   | 0                                      | 0                                       |                           |
| life experience of dogs * dog experience        | 0                                      | 0                                       |                           |
| main reason/use * frequency of hobbies          | 0                                      | 0                                       |                           |
| other dogs currently * average time spent alone | 0                                      | 0                                       |                           |
| other dogs currently * other dogs when acquired | 0                                      | 0                                       |                           |

**Table S8.** Results of model validation in trait Human sociability, related to STAR Methods. Chosen explanatory variables are in bold.

| <b>Human sociability</b>                        | <b>% present in random subsampling</b> | <b>% present in repeated train-test</b> | <b>relative influence</b> |
|-------------------------------------------------|----------------------------------------|-----------------------------------------|---------------------------|
| <b>sex</b>                                      | base                                   | base                                    | 0.92                      |
| <b>age</b>                                      | base                                   | base                                    | 14.48                     |
| <b>breed/breed group</b>                        | base                                   | base                                    | 68.00                     |
| <b>main reason/use</b>                          | 60                                     | 100                                     | 6.82                      |
| <b>level of socialisation</b>                   | 50                                     | 100                                     | 4.27                      |
| sterilisation status                            | 30                                     | 70                                      | 1.02                      |
| living place                                    | 10                                     | 20                                      | 0.42                      |
| other dogs currently                            | 10                                     | 10                                      | 0.02                      |
| life experience of dogs                         | 10                                     | 0                                       | 0.00                      |
| dog experience                                  | 0                                      | 40                                      | 1.57                      |
| average time spent alone                        | 0                                      | 40                                      | 1.37                      |
| frequency of hobbies                            | 0                                      | 70                                      | 0.95                      |
| daily exercise                                  | 0                                      | 0                                       | 0.09                      |
| dog obtained from                               | 0                                      | 10                                      | 0.08                      |
| other dogs when acquired                        | 0                                      | 10                                      | 0.00                      |
| main reason/use * frequency of hobbies          | 0                                      | 60                                      |                           |
| sex * sterilisation status                      | 0                                      | 10                                      |                           |
| daily exercise * frequency of hobbies           | 0                                      | 0                                       |                           |
| age * sex                                       | 0                                      | 0                                       |                           |
| living place * daily exercise                   | 0                                      | 0                                       |                           |
| life experience of dogs * dog experience        | 0                                      | 0                                       |                           |
| other dogs currently * average time spent alone | 0                                      | 0                                       |                           |
| other dogs currently * other dogs when acquired | 0                                      | 0                                       |                           |

**Table S9.** Results of model validation in trait Dog sociability, related to STAR Methods. Chosen explanatory variables are in bold.

| <b>Dog sociability</b>                          | <b>% present in random subsampling</b> | <b>% present in repeated train-test</b> | <b>relative influence</b> |
|-------------------------------------------------|----------------------------------------|-----------------------------------------|---------------------------|
| <b>sex</b>                                      | base                                   | base                                    | 4.37                      |
| <b>age</b>                                      | base                                   | base                                    | 79.66                     |
| <b>breed/breed group</b>                        | base                                   | base                                    | 11.74                     |
| <b>level of socialisation</b>                   | 50                                     | 100                                     | 0.70                      |
| main reason/use                                 | 30                                     | 100                                     | 0.41                      |
| sterilisation status                            | 40                                     | 90                                      | 0.91                      |
| dog experience                                  | 40                                     | 70                                      | 0.82                      |
| daily exercise                                  | 40                                     | 80                                      | 0.58                      |
| other dogs currently                            | 30                                     | 70                                      | 0.23                      |
| frequency of hobbies                            | 20                                     | 30                                      | 0.19                      |
| life experience of dogs                         | 20                                     | 10                                      | 0.02                      |
| dog obtained from                               | 10                                     | 80                                      | 0.26                      |
| average time spent alone                        | 10                                     | 30                                      | 0.07                      |
| living place                                    | 10                                     | 0                                       | 0.02                      |
| other dogs when acquired                        | 10                                     | 10                                      | 0.00                      |
| sex * sterilisation status                      | 10                                     | 70                                      |                           |
| age * sex                                       | 10                                     | 0                                       |                           |
| other dogs currently * other dogs when acquired | 0                                      | 10                                      |                           |
| life experience of dogs * dog experience        | 0                                      | 10                                      |                           |
| daily exercise * frequency of hobbies           | 0                                      | 0                                       |                           |
| living place * daily exercise                   | 0                                      | 0                                       |                           |
| main reason/use * frequency of hobbies          | 0                                      | 0                                       |                           |
| other dogs currently * average time spent alone | 0                                      | 0                                       |                           |

**Table S10.** Results of model validation in trait Perseverance, related to STAR Methods. Chosen explanatory variables are in bold.

| <b>Perseverance</b>                             | <b>% present in random subsampling</b> | <b>% present in repeated train-test</b> | <b>relative influence</b> |
|-------------------------------------------------|----------------------------------------|-----------------------------------------|---------------------------|
| <b>sex</b>                                      | base                                   | base                                    | 0.00                      |
| <b>age</b>                                      | base                                   | base                                    | 8.54                      |
| <b>breed/breed group</b>                        | base                                   | base                                    | 62.69                     |
| <b>main reason/use</b>                          | 80                                     | 100                                     | 7.86                      |
| <b>other dogs when acquired</b>                 | 60                                     | 100                                     | 7.42                      |
| frequency of hobbies                            | 40                                     | 100                                     | 5.60                      |
| other dogs currently                            | 20                                     | 100                                     | 3.53                      |
| dog experience                                  | 20                                     | 40                                      | 2.21                      |
| daily exercise                                  | 20                                     | 30                                      | 0.67                      |
| level of socialisation                          | 20                                     | 40                                      | 0.36                      |
| sterilisation status                            | 10                                     | 30                                      | 0.56                      |
| life experience of dogs                         | 10                                     | 10                                      | 0.22                      |
| dog obtained from                               | 10                                     | 0                                       | 0.00                      |
| average time spent alone                        | 0                                      | 0                                       | 0.34                      |
| living place                                    | 0                                      | 0                                       | 0.00                      |
| age * sex                                       | 20                                     | 0                                       |                           |
| other dogs currently * other dogs when acquired | 0                                      | 10                                      |                           |
| sex * sterilisation status                      | 0                                      | 0                                       |                           |
| daily exercise * frequency of hobbies           | 0                                      | 0                                       |                           |
| living place * daily exercise                   | 0                                      | 0                                       |                           |
| life experience of dogs * dog experience        | 0                                      | 0                                       |                           |
| main reason/use * frequency of hobbies          | 0                                      | 0                                       |                           |
| other dogs currently * average time spent alone | 0                                      | 0                                       |                           |

**Table S11.** Range, mean and standard deviation (SD) of continuous variables, related to STAR Methods.

| <b>Variable</b>                | <b>Range</b> | <b>Mean</b> | <b>SD</b> |
|--------------------------------|--------------|-------------|-----------|
| Age                            | 0.18 - 17.13 | 5.18        | 3.44      |
| Insecurity score               | -1.65 - 4.04 | -0.02       | 0.99      |
| Training focus score           | -5.10 - 2.48 | 0.01        | 1.00      |
| Energy score                   | -3.94 - 2.10 | -0.01       | 1.00      |
| Aggressiveness/dominance score | -1.56 - 4.00 | 0.00        | 0.99      |
| Human sociability score        | -4.91 - 1.83 | -0.01       | 1.00      |
| Dog sociability score          | -3.18 - 2.28 | 0.01        | 0.99      |
| Perseverance score             | -4.16 - 3.80 | -0.01       | 0.99      |



**Table S12.** Categorical variables, their levels, and frequencies, related to STAR Methods.

| <b>Variable</b>   | <b>Level</b>                       | <b>Freq</b> | <b>%</b> |
|-------------------|------------------------------------|-------------|----------|
| Breed/breed group | Asian primitive dogs               | 231         | 2.02     |
|                   | Australian Shepherd                | 277         | 2.43     |
|                   | Belgian shepherd dogs              | 197         | 1.73     |
|                   | Bernese Mountain Dogs              | 155         | 1.36     |
|                   | Bichon type dogs                   | 201         | 1.76     |
|                   | Border Collie                      | 452         | 3.96     |
|                   | Brachycephalic dogs                | 171         | 1.5      |
|                   | Bull type terriers                 | 169         | 1.48     |
|                   | Chinese Crested Dog                | 123         | 1.08     |
|                   | Dachshunds                         | 154         | 1.35     |
|                   | English herders                    | 200         | 1.75     |
|                   | European sighthounds               | 190         | 1.66     |
|                   | Fighting dogs                      | 153         | 1.34     |
|                   | Finnish Lapponian Dog              | 480         | 4.2      |
|                   | German Shepherd Dog                | 427         | 3.74     |
|                   | German spitz related breeds        | 328         | 2.87     |
|                   | Golden Retriever                   | 187         | 1.64     |
|                   | Hunting terriers                   | 337         | 2.95     |
|                   | Jack Russell Terrier               | 160         | 1.4      |
|                   | Labrador Retriever                 | 382         | 3.35     |
|                   | Lagotto Romagnolo                  | 184         | 1.61     |
|                   | Lapponian Herder                   | 177         | 1.55     |
|                   | Livestock guardian dogs            | 96          | 0.84     |
|                   | Mastiff type dogs                  | 280         | 2.45     |
|                   | Middle European herders            | 240         | 2.1      |
|                   | Middle European utility dogs       | 385         | 3.37     |
|                   | Miniature Pinscher                 | 132         | 1.16     |
|                   | Miniature Schnauzer                | 161         | 1.41     |
|                   | Mixed breed                        | 382         | 3.35     |
|                   | Northern companion spitzes         | 179         | 1.57     |
|                   | Northern hunting spitzes           | 143         | 1.25     |
|                   | Nova Scotia Duck Tolling Retriever | 123         | 1.08     |
|                   | Other breed                        | 86          | 0.75     |
|                   | Other companion dogs               | 278         | 2.43     |
|                   | Parson type terriers               | 151         | 1.32     |
|                   | Pinschers/Schnauzers               | 144         | 1.26     |
|                   | Pointers                           | 254         | 2.22     |
|                   | Poodles                            | 232         | 2.03     |
|                   | Primitive sighthounds              | 310         | 2.72     |
|                   | Retrievers/Flushing dogs           | 462         | 4.05     |
| Rough Collie      | 179                                | 1.57        |          |
| Scenthounds       | 90                                 | 0.79        |          |
| Schapendoes       | 102                                | 0.89        |          |

|                                           |                                         |      |       |
|-------------------------------------------|-----------------------------------------|------|-------|
|                                           | Shetland Sheepdog                       | 280  | 2.45  |
|                                           | Sled dogs                               | 147  | 1.29  |
|                                           | Smooth Collie                           | 141  | 1.23  |
|                                           | Spanish Water Dog                       | 226  | 1.98  |
|                                           | Teacup dogs                             | 129  | 1.13  |
|                                           | Welsh Corgis                            | 130  | 1.14  |
|                                           | Whippet                                 | 170  | 1.49  |
|                                           | White Swiss Shepherd Dog                | 150  | 1.31  |
|                                           | Yard terriers                           | 301  | 2.64  |
| Sex                                       | Female                                  | 6039 | 52.89 |
|                                           | Male                                    | 5379 | 47.11 |
| Sterilisation status                      | Intact                                  | 8677 | 75.99 |
|                                           | Neutered                                | 2741 | 24.01 |
| Main reason for ownership/use of the dog  | Family member                           | 7072 | 61.94 |
|                                           | Dog hobbies/work                        | 2487 | 21.78 |
|                                           | Pet                                     | 1859 | 16.28 |
| Obtained from                             | Born at owner's home                    | 884  | 7.74  |
|                                           | From a breeder                          | 9743 | 85.33 |
|                                           | Rescue/from a previous owner            | 791  | 6.93  |
| Level of socialisation                    | Q1 (poor)                               | 2410 | 21.11 |
|                                           | Q2                                      | 2430 | 21.28 |
|                                           | Q3                                      | 2417 | 21.17 |
|                                           | Q4 (best)                               | 2417 | 21.17 |
|                                           | Obtained after the socialisation period | 1744 | 15.27 |
| Living place                              | Rural                                   | 2991 | 26.20 |
|                                           | Urban                                   | 8427 | 73.80 |
| Other dogs in the household when acquired | Yes                                     | 6781 | 59.39 |
|                                           | No                                      | 4637 | 40.61 |
| Other dogs in the household currently     | Yes                                     | 7633 | 66.85 |
|                                           | No                                      | 3785 | 33.15 |
| Daily exercise                            | Under 1 hour                            | 1708 | 14.96 |
|                                           | 1-2 hours                               | 5619 | 49.21 |
|                                           | 2-3 hours                               | 3464 | 30.34 |
|                                           | Over 3 hours                            | 627  | 5.49  |
| Frequency of hobbies                      | Active                                  | 2853 | 24.99 |
|                                           | Active only at home                     | 1428 | 12.51 |
|                                           | Active only outside                     | 677  | 5.93  |
|                                           | Infrequent                              | 1204 | 10.54 |
|                                           | Never/no hobby                          | 5256 | 46.03 |
| Average time spent alone                  | Under 1 hour                            | 1341 | 11.74 |
|                                           | 1-3 hours                               | 1814 | 15.89 |
|                                           | 3-6 hours                               | 3072 | 26.90 |
|                                           | 6-8 hours                               | 3063 | 26.83 |
|                                           | Over 8 hours                            | 2128 | 18.64 |
| Life experience of dogs                   | Family dog(s) in childhood              | 7232 | 63.34 |

|                |                                  |      |       |
|----------------|----------------------------------|------|-------|
|                | Family dog(s) during adolescence | 1333 | 11.67 |
|                | First dog in adulthood           | 2853 | 24.99 |
| Dog experience | First dog                        | 2477 | 21.69 |
|                | Second dog                       | 2175 | 19.05 |
|                | 3-5th dog                        | 4459 | 39.05 |
|                | Over 5th dog                     | 2307 | 20.20 |

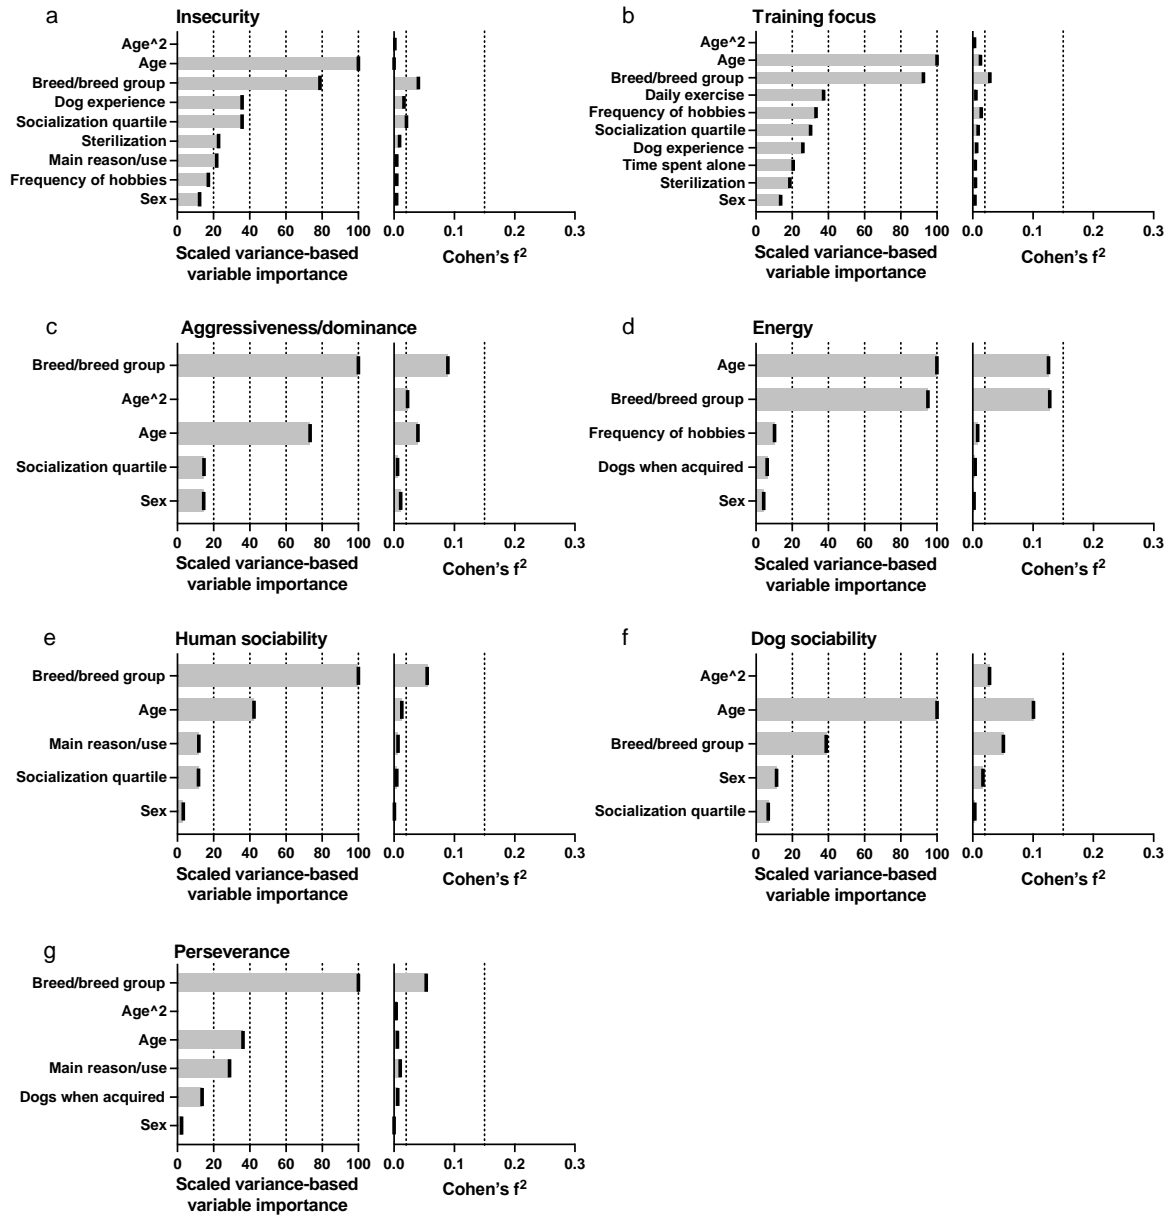

**Fig. S1.** Scaled variance-based variable importance (relative effect size) and Cohen's  $f^2$  (absolute effect size) of explanatory variables, related to Figure 1. a) insecurity, b) training focus, c) aggressiveness/dominance, d) energy, e) human sociability, f) dog sociability, and g) perseverance. In Cohen's  $f^2$ , lines (0.02 and 0.15) indicate small and medium effect sizes. Age<sup>2</sup> = age as a quadratic explanatory variable.

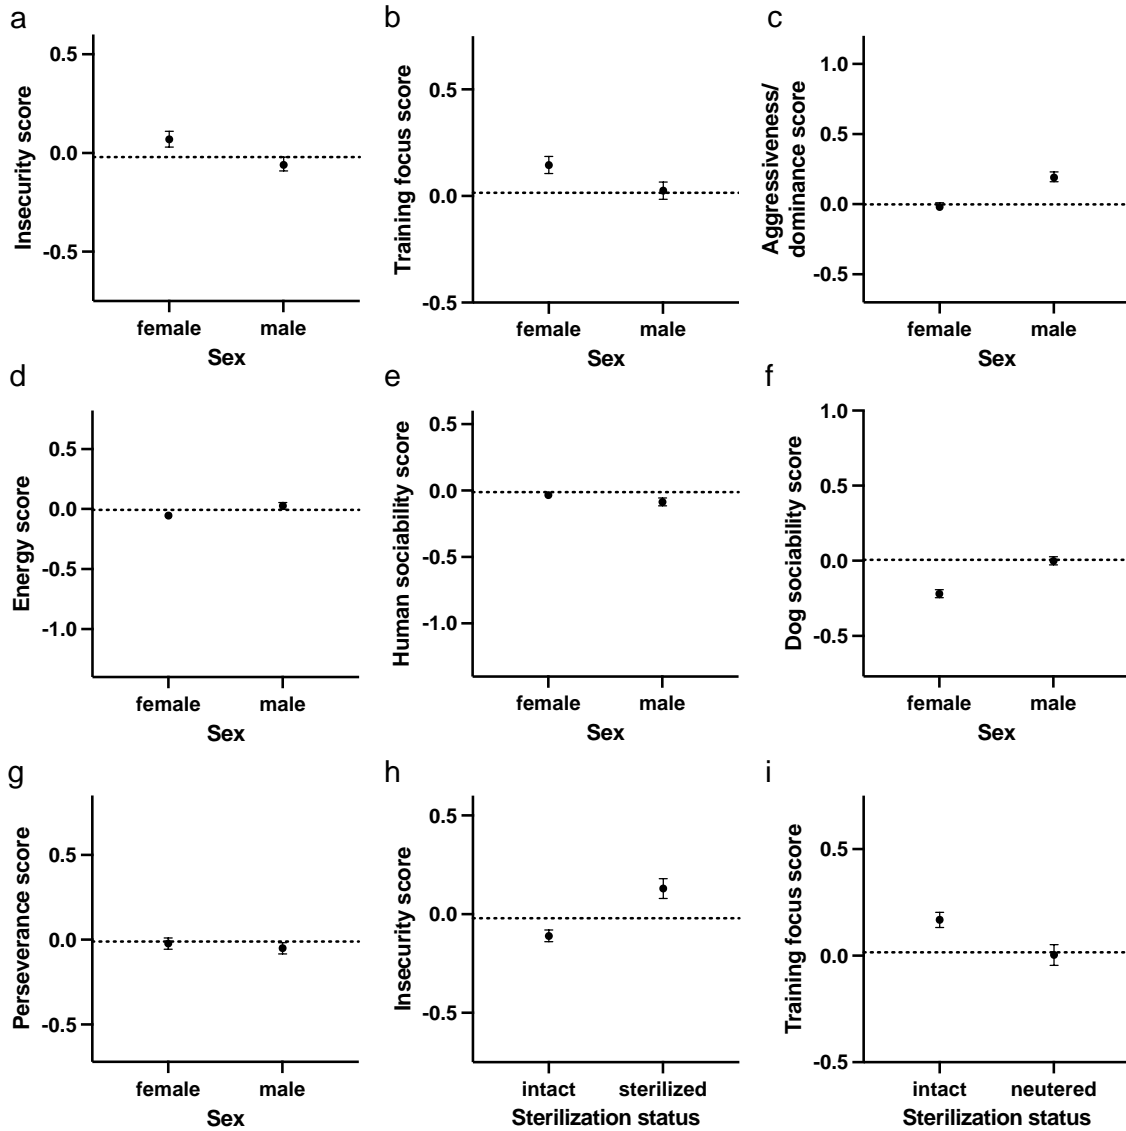

**Fig. S2.** Association of sex and sterilisation status with personality in the general and generalised linear models, related to Table 1. Association of sex with a) insecurity, b) training focus, c) aggressiveness/dominance, d) energy, e) human sociability, f) dog sociability, and g) perseverance and association of sterilisation status with h) insecurity and i) training focus. Error bars indicate 95% confidence limits. N = 11 418.

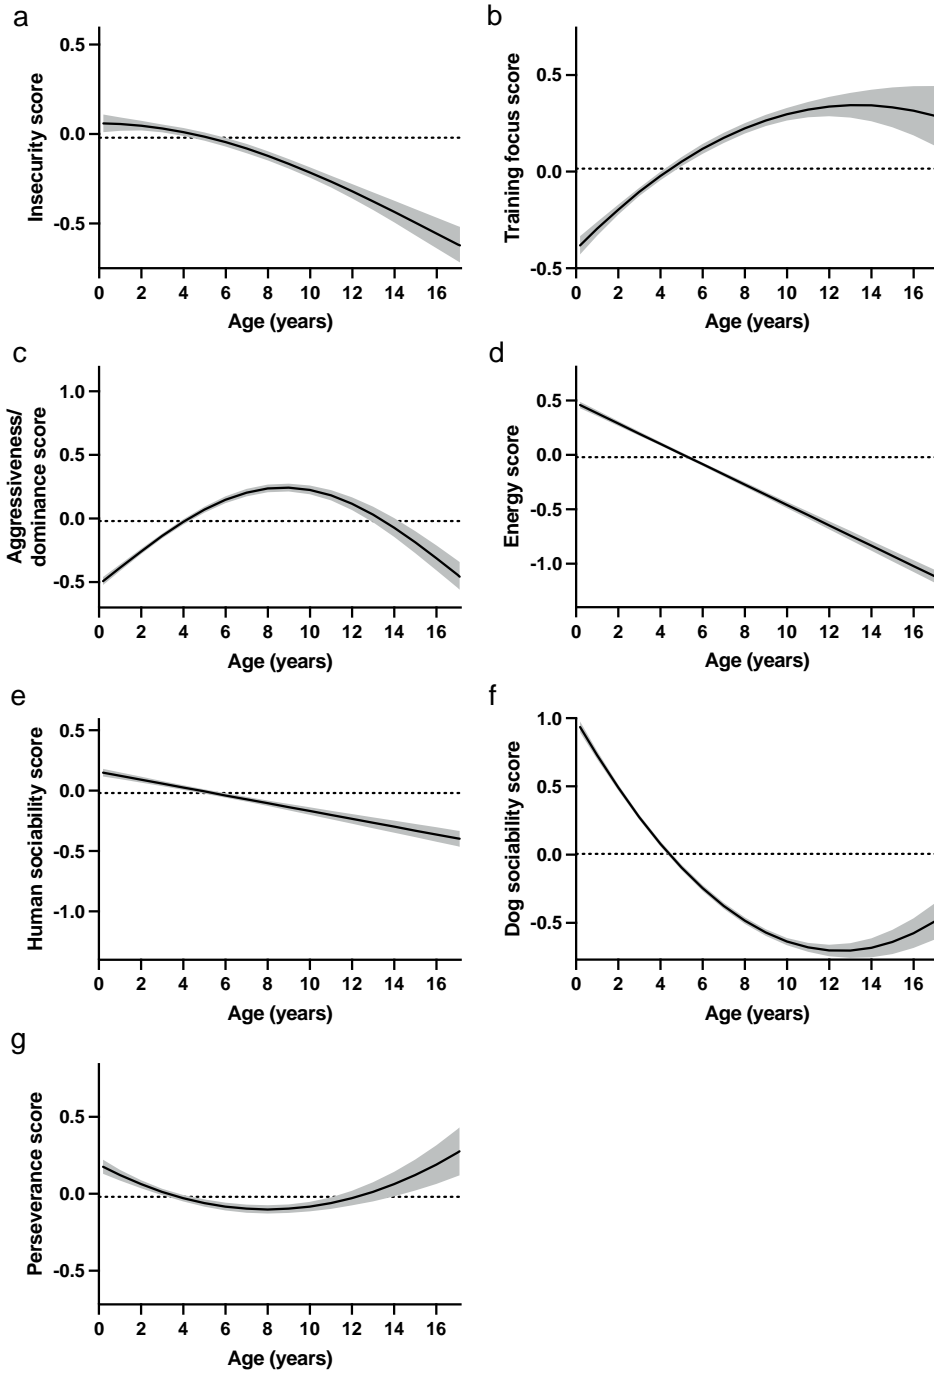

**Fig. S3.** Association of age with personality in general and generalized linear models, related to Table 1. A) insecurity, b) training focus, c) aggressiveness/dominance, d) energy, e) human sociability, f) dog sociability, and g) perseverance. Grey areas indicate 95% confidence limits. N = 11 418.

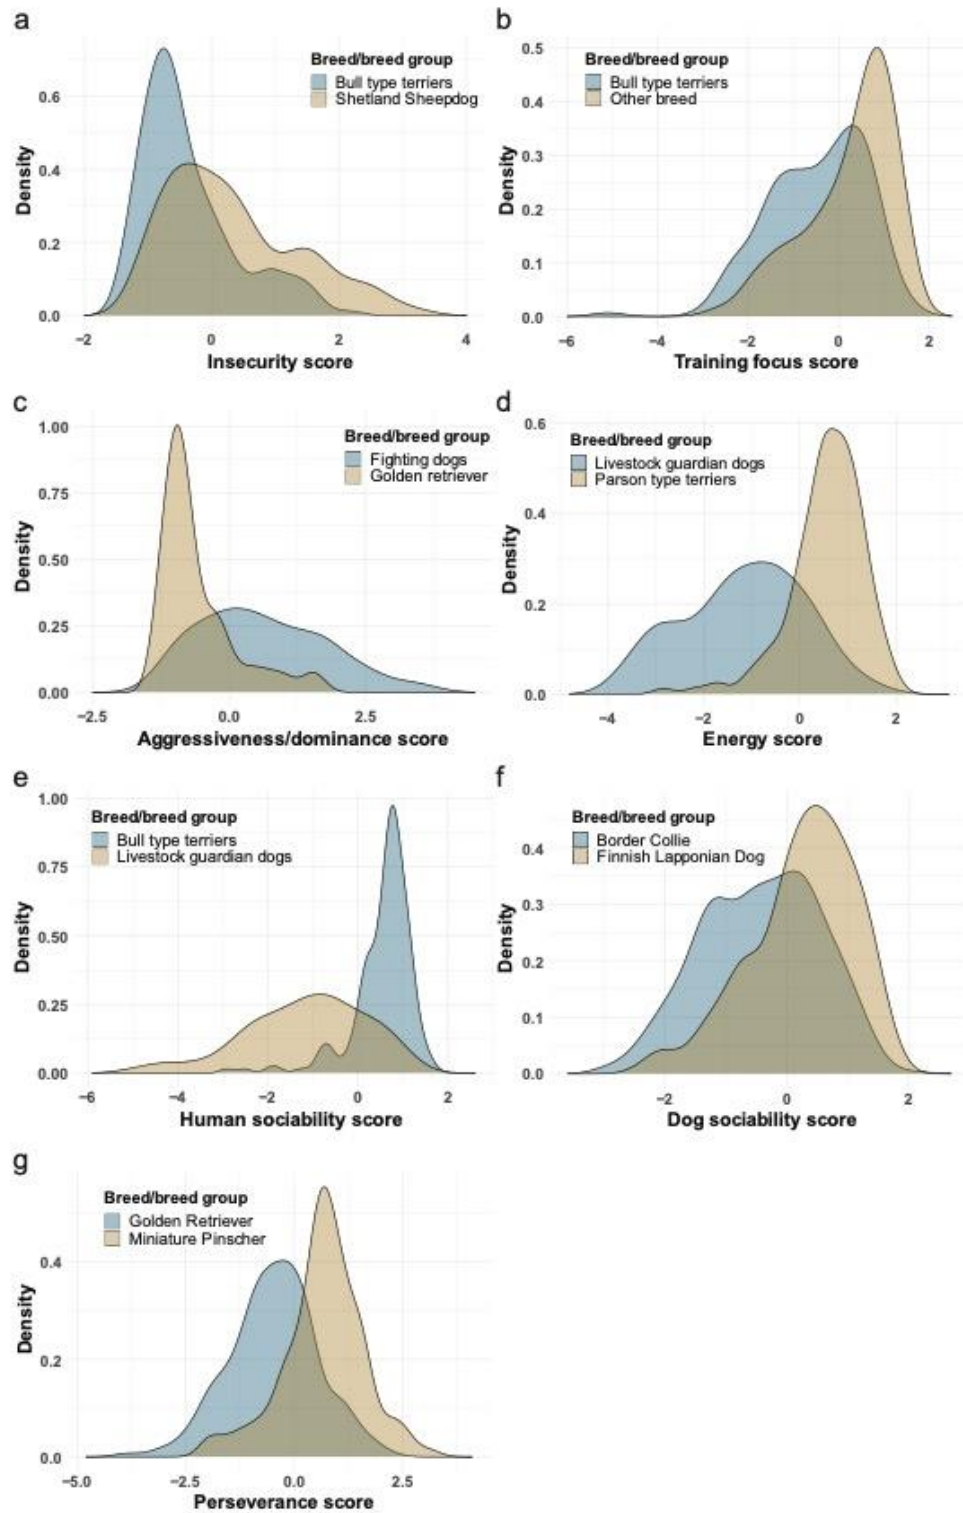

**Fig. S4.** Trait score distribution of the breeds with the highest and lowest mean scores in personality, related to Table 1. a) Insecurity, b) training focus, c) aggressiveness/dominance, d) energy, e) human sociability, f) dog sociability, and g) perseverance.

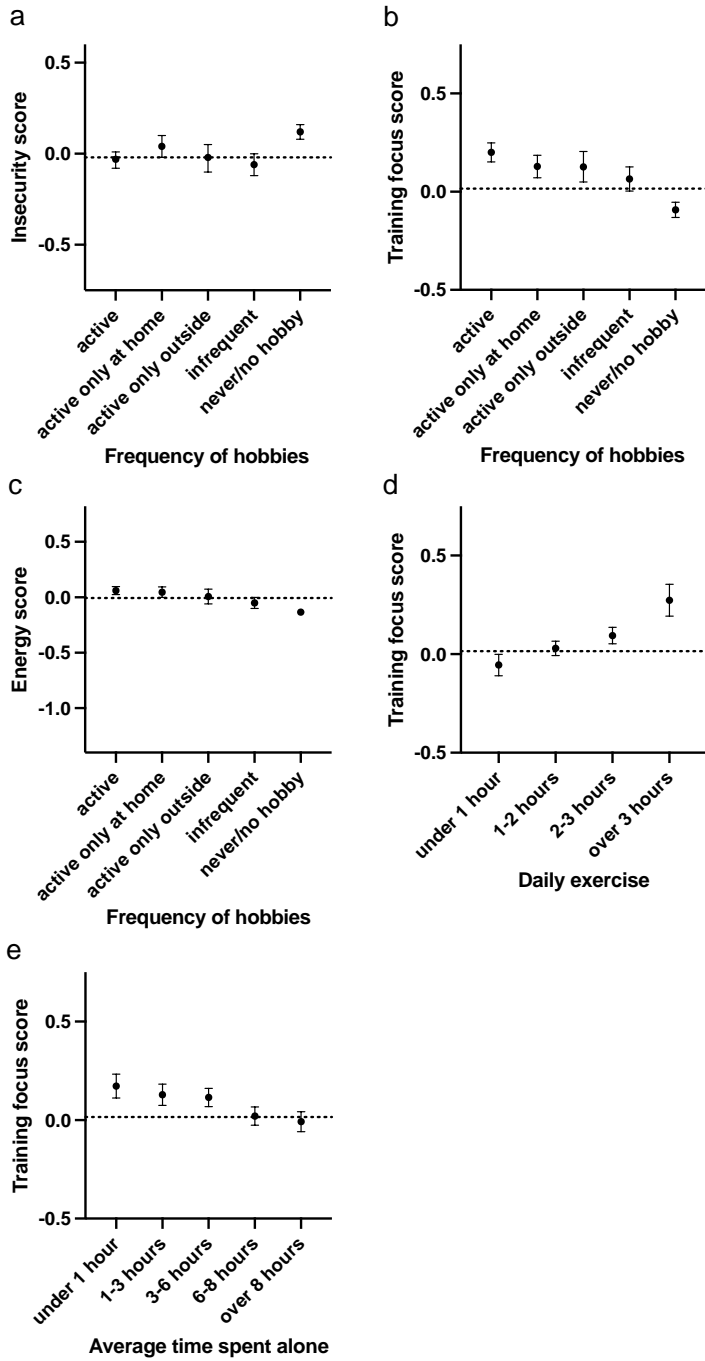

**Fig. S5.** Association of frequency of hobbies, daily exercise, and average time spent alone with personality in the general and generalised linear models, related to Table 1. Association of frequency of hobbies with a) insecurity, b) training focus, and c) energy and association of d) daily exercise and e) average time spent alone with training focus. Error bars indicate 95% confidence limits. N = 11 418.



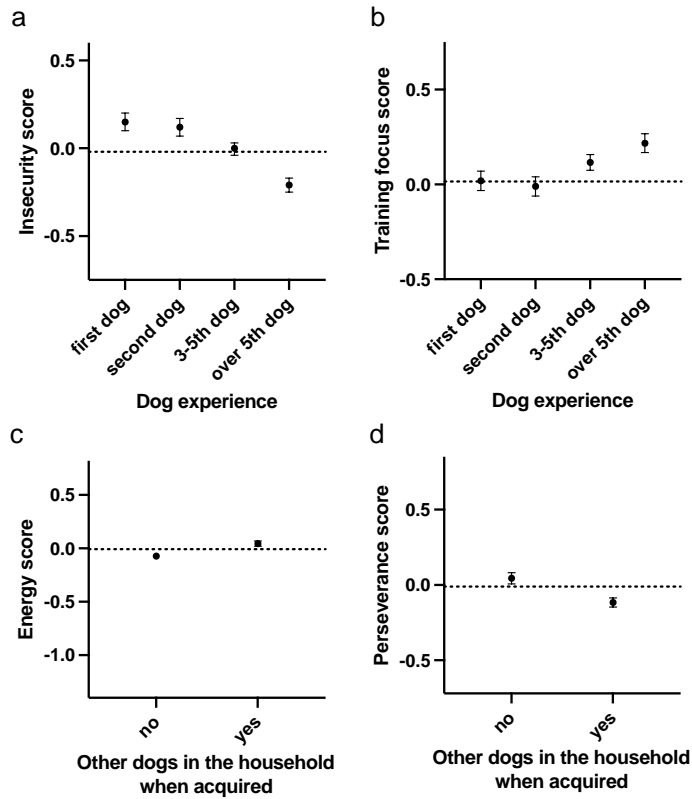

**Fig. S6.** Association of dog experience and other dogs in the household with personality in the general and generalised linear models, related to Table 1. Association of dog experience with a) insecurity and b) training focus and association of other dogs in the household when acquired with c) energy and d) perseverance. Error bars indicate 95% confidence limits. N = 11 418.

## Data S1. R code, related to STAR Methods.

```
#### DATA ####

pers.envi.small

#### 10-FOLD CV AIC MODEL SELECTION ####

library(airGLMs)

# split into 10 equal portions
set.seed(42)
osiot <- split(pers.envi.small, sample(rep(1:10)))

# model selection
airglm.1 <- airglms(config.1,score="AIC",verbose=T, sort="score")
airglm.2 <- airglms(config.2,score="AIC",verbose=T, sort="score")
airglm.3 <- airglms(config.3,score="AIC",verbose=T, sort="score")
airglm.4 <- airglms(config.4,score="AIC",verbose=T, sort="score")
airglm.5 <- airglms(config.5,score="AIC",verbose=T, sort="score")
airglm.6 <- airglms(config.6,score="AIC",verbose=T, sort="score")
airglm.7 <- airglms(config.7,score="AIC",verbose=T, sort="score")
airglm.8 <- airglms(config.8,score="AIC",verbose=T, sort="score")
airglm.9 <- airglms(config.9,score="AIC",verbose=T, sort="score")
airglm.10 <- airglms(config.10,score="AIC",verbose=T, sort="score")

#### REPEATED 2-FOLD ####

library(caret)
library(airGLMs)

# setting seed to generate a
# reproducible random sampling
set.seed(42)
twoK.five.folds <- createMultiFolds(pers.envi.small$dog.id, k = 2, times = 5)
twoK.five.data <- lapply(twoK.five.folds, function(ind, dat) dat[ind,], dat = pers.envi.small)

# model selection
airglm.1 <- airglms(config.1,score="AIC",verbose=T, sort="score")
airglm.2 <- airglms(config.2,score="AIC",verbose=T, sort="score")
airglm.3 <- airglms(config.3,score="AIC",verbose=T, sort="score")
airglm.4 <- airglms(config.4,score="AIC",verbose=T, sort="score")
airglm.5 <- airglms(config.5,score="AIC",verbose=T, sort="score")
airglm.6 <- airglms(config.6,score="AIC",verbose=T, sort="score")
airglm.7 <- airglms(config.7,score="AIC",verbose=T, sort="score")
airglm.8 <- airglms(config.8,score="AIC",verbose=T, sort="score")
airglm.9 <- airglms(config.9,score="AIC",verbose=T, sort="score")
airglm.10 <- airglms(config.10,score="AIC",verbose=T, sort="score")

#### IMPORTANCE OF VARIABLES: PACKAGE GBM ####

library(gbm)

#### *** insecurity ####
```

```

insec.data = pers.envi.small[c(3:14,16,24,26:27)]
colnames(insec.data)

set.seed(42)
gbm.insecurity <- gbm(formula = insecurity_score_add ~. ,
                      distribution = "gaussian", data = insec.data,
                      n.trees = 10000, interaction.depth = 1, shrinkage = 0.1,
                      bag.fraction = 0.5, cv.folds = 10)
print(gbm.insecurity)

# plot loss function as a result of n trees added to the ensemble
gbm.perf(gbm.insecurity, method = "cv")

# get MSE and compute RMSE
sqrt(min(gbm.insecurity$cv.error))

# influence of variables
# from the first analysis
set.seed(42)
summary(gbm.insecurity, method=permutation.test.gbm)

#### *** training focus ####

train.data = pers.envi.small[c(3:14,16,18,26:27)]
colnames(train.data)

set.seed(42)
gbm.train <- gbm(formula = training_focus_score ~. ,
                 distribution = "gaussian", data = train.data,
                 n.trees = 10000, interaction.depth = 1, shrinkage = 0.1,
                 bag.fraction = 0.5, cv.folds = 10)
print(gbm.train)

# plot loss of function as a result of n trees added to the ensemble
gbm.perf(gbm.train, method = "cv")

# get MSE and compute RMSE
sqrt(min(gbm.train$cv.error))

# influence of variables
set.seed(42)
summary(gbm.train, method=permutation.test.gbm)

#### *** energy ####

energy.data = pers.envi.small[c(3:14,16,19,26:27)]
colnames(energy.data)

set.seed(42)
gbm.energy <- gbm(formula = activity_playfulness_score ~. ,
                  distribution = "gaussian", data = energy.data,
                  n.trees = 10000, interaction.depth = 1, shrinkage = 0.1,
                  bag.fraction = 0.5, cv.folds = 10)
print(gbm.energy)

# plot loss of function as a result of n trees added to the ensemble

```

```

gbm.perf(gbm.energy, method = "cv")

# get MSE and compute RMSE
sqrt(min(gbm.energy$cv.error))

# influence of variables
set.seed(42)
summary(gbm.energy, method=permutation.test.gbm)

#### *** aggression/dominance ####

domin.data = pers.envi.small[c(3:14,16,25,26:27)]
colnames(domin.data)

set.seed(42)
gbm.domin <- gbm(formula = aggressiveness_dominance_score_add ~. ,
                 distribution = "gaussian", data = domin.data,
                 n.trees = 10000, interaction.depth = 1, shrinkage = 0.1,
                 bag.fraction = 0.5, cv.folds = 10)
print(gbm.domin)

# plot Loss of function as a result of n trees added to the ensemble
gbm.perf(gbm.domin, method = "cv")

# get MSE and compute RMSE
sqrt(min(gbm.domin$cv.error))

# influence of variables
set.seed(42)
summary(gbm.domin, method=permutation.test.gbm)

#### *** human sociability ####

humsoc.data <- pers.envi.small[c(3:14,16,21,26:27)]
colnames(humsoc.data)

set.seed(42)
gbm.humsoc <- gbm(formula = human_sociability_score ~. ,
                 distribution = "gaussian", data = humsoc.data,
                 n.trees = 10000, interaction.depth = 1, shrinkage = 0.1,
                 bag.fraction = 0.5, cv.folds = 10)
print(gbm.humsoc)

# plot Loss of function as a result of n trees added to the ensemble
gbm.perf(gbm.humsoc, method = "cv")

# get MSE and compute RMSE
sqrt(min(gbm.humsoc$cv.error))

# influence of variables
set.seed(42)
summary(gbm.humsoc, method=permutation.test.gbm)

#### *** dog sociability ####

```

```

dogsoc.data <- pers.envi.small[c(3:14,16,22,26:27)]
colnames(dogsoc.data)

set.seed(42)
gbm.dogsoc <- gbm(formula = dog_sociability_score ~. ,
                  distribution = "gaussian", data = dogsoc.data,
                  n.trees = 10000, interaction.depth = 1, shrinkage = 0.1,
                  bag.fraction = 0.5, cv.folds = 10)
print(gbm.dogsoc)

# plot loss of function as a result of n trees added to the ensemble
gbm.perf(gbm.dogsoc, method = "cv")

# get MSE and compute RMSE
sqrt(min(gbm.dogsoc$cv.error))

# influence of variables
set.seed(42)
summary(gbm.dogsoc, method=permutation.test.gbm)

#### *** perseverance ####

perseverance.data <- pers.envi.small[c(3:14,16,23,26:27)]
colnames(perseverance.data)

set.seed(42)
gbm.perseverance <- gbm(formula = perseverance_score ~. ,
                       distribution = "gaussian", data = perseverance.data,
                       n.trees = 10000, interaction.depth = 1, shrinkage = 0.1,
                       bag.fraction = 0.5, cv.folds = 10)
print(gbm.perseverance)

# plot loss of function as a result of n trees added to the ensemble
gbm.perf(gbm.perseverance, method = "cv")

# get MSE and compute RMSE
sqrt(min(gbm.perseverance$cv.error))

# influence of variables
set.seed(42)
summary(gbm.perseverance, method=permutation.test.gbm)

#### GLM MODELS ####

#### ** MODEL FIT ####

# for plotting residuals
library(rcompanion)
library(boot)

# for outliers
library(broom)
library(dplyr)

```

```

library(ggplot2)

# for checking the linearity assumption
library(gam)

# for multicollinearity
library(car)

# for autocorrelation of residuals
library(lmtest)

#### ***** insecurity ####

insecurity.model <- glm(insecurity_score_add ~ sex + Personality_age +
  breed_group + socialization_quantile +
  sterilization_status + dog_experience +
  ownership_reason + hobby_frequency,
  data=pers.envi.small, family=Gamma(link="log"))

# residuals: really good
plotNormalHistogram(residuals(insecurity.model))
glm.diag.plots(insecurity.model)

# Linearity of age
gam.insec <- gam(formula = insecurity_score_add ~ sex + s(Personality_age) +
  s(I(Personality_age^2)) +
  breed_group + socialization_quantile +
  sterilization_status + dog_experience +
  ownership_reason + hobby_frequency,
  data=pers.envi.small,
  family=Gamma(link="log"))

# nonlinearity detected
# with age^2 nicely linear
summary(gam.insec)
plot(gam.insec)

# influential data points
# plot with three most influential labelled
plot(insecurity.model, which = 4, id.n = 3)

# compute standardized residuals
model.data <- augment(insecurity.model) %>%
  mutate(index = 1:n())
# display the data points with the highest Cook's distances
options(tibble.width = Inf)
options(max.print = 10000)
model.data %>% top_n(3, .cooksd)
# and with highest and lowest std. resid
model.data %>% top_n(3, .std.resid)
model.data %>% top_n(-5, .std.resid)
# visualize the standardized residuals
ggplot(model.data, aes(index, .std.resid)) +
  geom_point(aes(color = insecurity_score_add), alpha = .5) +
  theme_bw()

# removed and refitted
pers.envi.small[c(6017,7092,7779,7884,8858,9224,9282,11141,11293),]

```

```

insec.test <- pers.envi.small[-c(6017,7092,7779,7884,8858,9224,9282,11141,11293),]

insecurity.model.test <- glm(insecurity_score_add ~ sex + Personality_age +
                             breed_group + socialization_quantile +
                             sterilization_status + dog_experience +
                             ownership_reason + hobby_frequency,
                             data=insec.test, family=Gamma(link="log"))
# doesn't influence results and thus, kept in the model
summary(insecurity.model)
summary(insecurity.model.test)

# multicollinearity
# no multicollinearity
vif(insecurity.model)

# autocorrelation of residuals
# no autocorrelation
dwtest(insecurity.model)

#### ***** training focus ####

training.model <- glm(training_focus_score ~ sex + Personality_age +
                     breed_group + hobby_frequency + daily_exercise +
                     socialization_quantile + sterilization_status +
                     alone_time + dog_experience,
                     data=pers.envi.small, family=gaussian(link="identity"))

# residuals: could be improved
plotNormalHistogram(residuals(training.model))
glm.diag.plots(training.model)

# Let's fit Gamma model
pers.envi.small$training_focus_add <- pers.envi.small$training_focus_score + 5.3
training.gamma <- glm(training_focus_add ~ sex + Personality_age +
                    breed_group + hobby_frequency + daily_exercise +
                    socialization_quantile + sterilization_status +
                    alone_time + dog_experience,
                    data=pers.envi.small, family=Gamma(link="log"))
# residuals of Gamma model: worse
plotNormalHistogram(residuals(training.gamma))
glm.diag.plots(training.gamma)
# so we'll continue with normal distribution

# Linearity of age
gam.train <- gam(formula = training_focus_score ~ sex + s(Personality_age) +
                s(I(Personality_age^2)) +
                breed_group + hobby_frequency + daily_exercise +
                socialization_quantile + sterilization_status +
                alone_time + dog_experience,
                data=pers.envi.small,
                family=gaussian(link="identity"))
# nonlinearity detected
# with age^2 somewhat linear
summary(gam.train)
plot(gam.train)

# influential data points

```

```

# plot with three most influential labelled
plot(training.model, which = 4, id.n = 3)

# compute standardized residuals
model.data <- augment(training.model) %>%
  mutate(index = 1:n())
# display the data points with the highest Cook's distances
options(tibble.width = Inf)
options(max.print = 10000)
model.data %>% top_n(3, .cooks)
# and with highest and lowest std. resid
model.data %>% top_n(3, .std.resid)
model.data %>% top_n(-6, .std.resid)
# visualize the standardized residuals
ggplot(model.data, aes(index, .std.resid)) +
  geom_point(aes(color = training_focus_score), alpha = .5) +
  theme_bw()

# removed and refitted
train.test <- pers.envi.small[-c(1203,4440,5957,7905,11294,11379),]

training.model.test <- glm(training_focus_score ~ sex + Personality_age +
  breed_group + hobby_frequency + daily_exercise +
  socialization_quantile + sterilization_status +
  alone_time + dog_experience,
  data=train.test, family=gaussian(link="identity"))
# doesn't influence results and thus, kept in the model
summary(training.model)
summary(training.model.test)

# multicollinearity
# no multicollinearity
vif(training.model)

# autocorrelation of residuals
# test significant, but DW=1.92 = no autocorrelation
dwtest(training.model)

#### ***** energy ####

energy.model <- glm(activity_playfulness_score ~ sex + Personality_age +
  breed_group + hobby_frequency + dogs_acquired,
  data=pers.envi.small, family=gaussian(link="identity"))

# residuals: very good
plotNormalHistogram(residuals(energy.model))
glm.diag.plots(energy.model)

# Linearity of age
gam.energy <- gam(formula = activity_playfulness_score ~ sex + s(Personality_age) +
  s(I(Personality_age^2)) +
  breed_group + hobby_frequency + dogs_acquired,
  data=pers.envi.small,
  family=gaussian(link="identity"))
# no nonlinearity, but let's test age^2
# with age^2 worse

```



```

# so let's keep it this way
summary(gam.energy)
plot(gam.energy)

# influential data points
# plot with three most influential labelled
plot(energy.model, which = 4, id.n = 3)

# compute standardized residuals
model.data <- augment(energy.model) %>%
  mutate(index = 1:n())
# display the data points with the highest Cook's distances
options(tibble.width = Inf)
options(max.print = 10000)
model.data %>% top_n(3, .cooks)
# and with highest and lowest std. resid
model.data %>% top_n(3, .std.resid)
model.data %>% top_n(-6, .std.resid)
# visualize the standardized residuals
ggplot(model.data, aes(index, .std.resid)) +
  geom_point(aes(color = activity_playfulness_score), alpha = .5) +
  theme_bw()

# removed and refitted
energy.test <- pers.envi.small[-c(711,2886,3352,3917,4355,5230,6905,7123,8667,11403),]

energy.model.test <- glm(activity_playfulness_score ~ sex + Personality_age +
  breed_group + hobby_frequency + dogs_acquired,
  data=energy.test, family=gaussian(link="identity"))
# doesn't influence results and thus, kept in the model
summary(energy.model)
summary(energy.model.test)

# multicollinearity
# no multicollinearity
vif(energy.model)

# autocorrelation of residuals
# no autocorrelation
dwtest(energy.model)

#### ***** dominance ####

dominance.model <- glm(aggresiveness_dominance_score_add ~ sex +
  Personality_age + breed_group +
  socialization_quantile,
  data=pers.envi.small, family=Gamma(link="log"))

# residuals: really good
plotNormalHistogram(residuals(dominance.model))
glm.diag.plots(dominance.model)

# Linearity of age
gam.domin <- gam(formula = aggresiveness_dominance_score_add ~ sex +
  s(Personality_age) + s(I(Personality_age^2)) +
  breed_group + socialization_quantile,
  data=pers.envi.small,

```

```

        family=Gamma(link="log"))
# very high nonlinearity
# with age^2 nicely linear
summary(gam.domin)
plot(gam.domin)

# influential data points
# plot with three most influential labelled
plot(dominance.model, which = 4, id.n = 3)

# compute standardized residuals
model.data <- augment(dominance.model) %>%
  mutate(index = 1:n())
# display the data points with the highest Cook's distances
options(tibble.width = Inf)
options(max.print = 10000)
model.data %>% top_n(3, .cooks)
# and with highest and lowest std. resid
model.data %>% top_n(3, .std.resid)
model.data %>% top_n(-6, .std.resid)
# visualize the standardized residuals
ggplot(model.data, aes(index, .std.resid)) +
  geom_point(aes(color = aggressiveness_dominance_score_add), alpha = .5) +
  theme_bw()

# removed and refitted
domin.test <- pers.envi.small[-c(853,1908,3834,4099,5267,8212,8293,8596,10925),]

dominance.model.test <- glm(aggressiveness_dominance_score_add ~ sex +
  Personality_age + breed_group +
  socialization_quantile,
  data=domin.test, family=Gamma(link="log"))
# doesn't influence results and thus, kept in the model
summary(dominance.model)
summary(dominance.model.test)

# multicollinearity
# no multicollinearity
vif(dominance.model)

# autocorrelation of residuals
# no autocorrelation
dwtest(dominance.model)

#### ***** human sociability ####

human.soc.model <- glm(human_sociability_score ~ sex +
  Personality_age + breed_group +
  ownership_reason + socialization_quantile,
  data=pers.envi.small, family=gaussian(link="identity"))

# residuals: could be improved
plotNormalHistogram(residuals(human.soc.model))
glm.diag.plots(human.soc.model)
# gamma doesn't fit any better, so let's continue with normal
pers.envi.small$human_sociability_score_add <- pers.envi.small$human_sociability_score + 4.92
human.soc.model.gamma <- glm(human_sociability_score_add ~ sex +

```

```

        Personality_age + breed_group +
        ownership_reason + socialization_quantile,
        data=pers.envi.small, family=Gamma(link="log"))
plotNormalHistogram(residuals(human.soc.model.gamma))
glm.diag.plots(human.soc.model.gamma)

# Linearity of age
gam.hum.soc <- gam(formula = human_sociability_score ~ sex +
                  s(Personality_age) + s(I(Personality_age^2)) +
                  breed_group +
                  ownership_reason + socialization_quantile,
                  data=pers.envi.small,
                  family=gaussian(link="identity"))
# slight nonlinearity
# with age^2 worsened
# so let's keep it this way
summary(gam.hum.soc)
plot(gam.hum.soc)

# influential data points
# plot with three most influential labelled
plot(human.soc.model, which = 4, id.n = 3)

# compute standardized residuals
model.data <- augment(human.soc.model) %>%
  mutate(index = 1:n())
# display the data points with the highest Cook's distances
options(tibble.width = Inf)
options(max.print = 10000)
model.data %>% top_n(3, .cooksd)
# and with highest and lowest std. resid
model.data %>% top_n(3, .std.resid)
model.data %>% top_n(-10, .std.resid)
# visualize the standardized residuals
ggplot(model.data, aes(index, .std.resid)) +
  geom_point(aes(color = human_sociability_score), alpha = .5) +
  theme_bw()

# removed and refitted
hum.soc.test <- pers.envi.small[-c(1657,2476,3483,4850,5364,5576,5903,8305,8401,10198,11294),]

hum.soc.model.test <- glm(human_sociability_score ~ sex +
                        Personality_age + breed_group +
                        ownership_reason + socialization_quantile,
                        data=hum.soc.test, family=gaussian(link="identity"))
# doesn't influence results and thus, kept in the model
summary(human.soc.model)
summary(hum.soc.model.test)

# multicollinearity
# no multicollinearity
vif(human.soc.model)

# autocorrelation of residuals
# small p-value but DW = 1.94 = no autocorrelation
dwtest(human.soc.model)

```

```

#### ***** dog sociability ####

dog.soc.model <- glm(dog_sociability_score ~ sex +
                    Personality_age + breed_group +
                    socialization_quantile,
                    data=pers.envi.small, family=gaussian(link="identity"))

# residuals: very good
plotNormalHistogram(residuals(dog.soc.model))
glm.diag.plots(dog.soc.model)

# Linearity of age
gam.dog.soc <- gam(formula = dog_sociability_score ~ sex +
                  s(Personality_age) + s(I(Personality_age^2)) +
                  breed_group +
                  socialization_quantile,
                  data=pers.envi.small,
                  family=gaussian(link="identity"))
# nonlinearity detected
# with age^2 improved
summary(gam.dog.soc)
plot(gam.dog.soc)

# influential data points
# plot with three most influential labelled
plot(dog.soc.model, which = 4, id.n = 3)

# compute standardized residuals
model.data <- augment(dog.soc.model) %>%
  mutate(index = 1:n())
# display the data points with the highest Cook's distances
options(tibble.width = Inf)
options(max.print = 10000)
model.data %>% top_n(3, .cooksd)
# and with highest and lowest std. resid
model.data %>% top_n(3, .std.resid)
model.data %>% top_n(-6, .std.resid)
# visualize the standardized residuals
ggplot(model.data, aes(index, .std.resid)) +
  geom_point(aes(color = dog_sociability_score), alpha = .5) +
  theme_bw()

# removed and refitted
dog.soc.test <- pers.envi.small[-c(63,1148,2201,2509,3753,5624,7624,8248,8361,9187),]

dog.soc.model.test <- glm(dog_sociability_score ~ sex +
                        Personality_age + breed_group +
                        socialization_quantile,
                        data=dog.soc.test, family=gaussian(link="identity"))
# doesn't influence results and thus, kept in the model
summary(dog.soc.model)
summary(dog.soc.model.test)

# multicollinearity
# no multicollinearity
vif(dog.soc.model)

# autocorrelation of residuals
# small p-value but DW = 1.91 = no autocorrelation
dwtest(dog.soc.model)

```

```

#### ***** perseverance ####

perseverance.model <- glm(perseverance_score ~ sex +
  Personality_age +
  breed_group + ownership_reason +
  dogs_acquired,
  data=pers.envi.small, family=gaussian(link="identity"))

# residuals: excellent
plotNormalHistogram(residuals(perseverance.model))
glm.diag.plots(perseverance.model)

# Linearity of age
gam.perseverance <- gam(formula = perseverance_score ~ sex +
  s(Personality_age) + s(I(Personality_age^2)) +
  breed_group + ownership_reason +
  dogs_acquired,
  data=pers.envi.small,
  family=gaussian(link="identity"))
# nonlinearity detected
# with age^2 improved
summary(gam.perseverance)
plot(gam.perseverance)

# influential data points
# plot with three most influential labelled
plot(perseverance.model, which = 4, id.n = 3)

# compute standardized residuals
model.data <- augment(perseverance.model) %>%
  mutate(index = 1:n())
# display the data points with the highest Cook's distances
options(tibble.width = Inf)
options(max.print = 10000)
model.data %>% top_n(3, .cooksd)
# and with highest and lowest std. resid
model.data %>% top_n(5, .std.resid)
model.data %>% top_n(-5, .std.resid)
# visualize the standardized residuals
ggplot(model.data, aes(index, .std.resid)) +
  geom_point(aes(color = perseverance_score), alpha = .5) +
  theme_bw()

# removed and refitted
perseverance.test <- pers.envi.small[-c(88,149,3144,3644,6428,6451,7036,8597,9798,11294),]

perseverance.model.test <- glm(perseverance_score ~ sex +
  Personality_age +
  breed_group + ownership_reason +
  dogs_acquired,
  data=perseverance.test, family=gaussian(link="identity"))
# doesn't influence results and thus, kept in the model
summary(perseverance.model)
summary(perseverance.model.test)

```

```

# multicollinearity
# no multicollinearity
vif(perseverance.model)

# autocorrelation of residuals
# small p-value but DW = 1.91 = no autocorrelation
dwtest(perseverance.model)

#### ** RESULTS ####

# for Anova
library(car)

# for categorical variables
library(emmeans)

# for continuous variables
library(effects)

# for writing out pairwise results in .csv
library(erer)

#### outlier 11294 removed from data as it pops out in 3/7 ####

pers.envi.small.ed <- pers.envi.small[-11294,]
pers.envi.small[11294,]
nrow(pers.envi.small.ed)
summary(pers.envi.small.ed)

#### ***** insecurity ####

insecurity.model.final <- glm(insecurity_score_add ~ sex + Personality_age +
                             I(Personality_age^2) +
                             breed_group + socialization_quantile +
                             sterilization_status + dog_experience +
                             ownership_reason + hobby_frequency,
                             data=pers.envi.small.ed, family=Gamma(link="log"))

### anova with f test values
Anova(insecurity.model.final, type="III", test.statistic="F")

# glance of results
plot(allEffects(insecurity.model.final))

# emmeans objects
insec.sex <- emmeans(insecurity.model.final, "sex", type="response")
insec.breed <- emmeans(insecurity.model.final, "breed_group", type="response")
insec.socialization <- emmeans(insecurity.model.final, "socialization_quantile", type="response")
insec.sterilization <- emmeans(insecurity.model.final, "sterilization_status", type="response")
insec.experience <- emmeans(insecurity.model.final, "dog_experience", type="response")
insec.reason <- emmeans(insecurity.model.final, "ownership_reason", type="response")
insec.hobby <- emmeans(insecurity.model.final, "hobby_frequency", type="response")

```

```

# pairwise differences
pairwise.contrasts <- list(pairs(insec.sex,adjust="none"),
                          pairs(insec.socialization,adjust="none"),
                          pairs(insec.sterilization,adjust="none"),
                          pairs(insec.experience,adjust="none"),
                          pairs(insec.reason,adjust="none"),
                          pairs(insec.hobby,adjust="none"),
                          pairs(insec.breed,adjust="none"))
write.list(pairwise.contrasts,file="pairwise.csv")

### age
insecurity.age <- Effect(focal.predictors = c("Personality_age"), mod = insecurity.model.final
,
                      xlevels=list(Personality_age=c(0.2,1,2,3,4,5,6,7,8,9,10,11,12,13,1
4,15,16,17,17.1)),
                      confint=TRUE)
mean.cl <- data.frame(insecurity.age$fit,insecurity.age$lower,insecurity.age$upper)
mean.cl.exp <- exp(mean.cl)
mean.cl.trans <- mean.cl.exp - 1.67

mean.cl.fin <- data.frame(insecurity.age$x,mean.cl.exp,mean.cl.trans)
mean.cl.fin

#### ***** training focus ####

training.model.final <- glm(training_focus_score ~ sex + Personality_age +
                          I(Personality_age^2) +
                          breed_group + hobby_frequency + daily_exercise +
                          socialization_quantile + sterilization_status +
                          alone_time + dog_experience,
                          data=pers.envi.small.ed, family=gaussian(link="identity"))
summary(training.model.final)
### anova with f test values
Anova(training.model.final, type="III", test.statistic="F")

# glance of results
plot(allEffects(training.model.final))

# reference grid for emmeans
training.grid <- ref_grid(training.model.final)
# save the reference grid
save(training.grid,file="training-grid-final.RData")

train.sex <- emmeans(training.grid, "sex", type="response")
train.breed <- emmeans(training.grid, "breed_group", type="response")
train.hobby <- emmeans(training.grid, "hobby_frequency", type="response")
train.exercise <- emmeans(training.grid, "daily_exercise", type="response")
train.socialization <- emmeans(training.grid, "socialization_quantile", type="response")
train.sterilization <- emmeans(training.grid, "sterilization_status", type="response")
train.alone <- emmeans(training.grid, "alone_time", type="response")
train.experience <- emmeans(training.grid, "dog_experience", type="response")

```

```

# pairwise differences
pairwise.contrasts <- list(pairs(train.sex,adjust="none"),
  pairs(train.hobby,adjust="none"),
  pairs(train.exercise,reverse=T,adjust="none"),
  pairs(train.socialization,adjust="none"),
  pairs(train.sterilization,adjust="none"),
  pairs(train.alone,adjust="none"),
  pairs(train.experience,adjust="none"),
  pairs(train.breed,adjust="none"))
write.list(pairwise.contrasts,file="pairwise.csv")

### age

training.age <- Effect(focal.predictors = c("Personality_age"), mod = training.model.final,
  xlevels=list(Personality_age=c(0.2,1,2,3,4,5,6,7,8,9,10,11,12,13,14,1
5,16,17,17.1)),
  confint=TRUE)
mean.cl <- data.frame(training.age$x,training.age$fit,training.age$lower,training.age$upper)
mean.cl

summary(pers.envi.small)

#### ***** energy ####

energy.model.final <- glm(activity_playfulness_score ~ sex + Personality_age +
  breed_group + hobby_frequency + dogs_acquired,
  data=pers.envi.small.ed, family=gaussian(link="identity"))

### anova with f test values
Anova(energy.model.final, type="III", test.statistic="F")

# glance of results
plot(allEffects(energy.model.final))

energy.sex <- emmeans(energy.model.final, "sex", type="response")
energy.breed <- emmeans(energy.model.final, "breed_group", type="response")
energy.hobby <- emmeans(energy.model.final, "hobby_frequency", type="response")
energy.dogs.acquired <- emmeans(energy.model.final, "dogs_acquired", type="response")

# pairwise differences
pairwise.contrasts <- list(pairs(energy.sex,adjust="none"),
  pairs(energy.hobby,adjust="none"),
  pairs(energy.dogs.acquired,adjust="none"),
  pairs(energy.breed,adjust="none"))
write.list(pairwise.contrasts,file="pairwise.csv")

### age

energy.age <- Effect(focal.predictors = c("Personality_age"), mod = energy.model.final,
  xlevels=list(Personality_age=c(0.2,1,2,3,4,5,6,7,8,9,10,11,12,13,14,15,

```



```

16,17,17.1)),
                                confint=TRUE)
mean.cl <- data.frame(energy.age$x,energy.age$fit,energy.age$lower,energy.age$upper)
mean.cl

summary(pers.envi.small)

#### ***** dominance ####

dominance.model.final <- glm(aggresiveness_dominance_score_add ~ sex +
                             Personality_age + I(Personality_age^2) +
                             breed_group + socialization_quantile,
                             data=pers.envi.small.ed, family=Gamma(link="log"))

### anova with f test values
Anova(dominance.model.final, type="III", test.statistic="F")

# glance of results
plot(allEffects(dominance.model.final))

# emmeans objects
domin.sex <- emmeans(dominance.model.final, "sex", type="response")
domin.breed <- emmeans(dominance.model.final, "breed_group", type="response")
domin.socialization <- emmeans(dominance.model.final, "socialization_quantile", type="response")

# if effect sizes required
eff_size(domin.sex, sigma = sigma(dominance.model.final), edf = df.residual(dominance.model.final))
eff_size(domin.breed, sigma = sigma(dominance.model.final), edf = df.residual(dominance.model.final))

# pairwise differences
pairwise.contrasts <- list(pairs(domin.sex,adjust="none"),
                           pairs(domin.socialization,adjust="none"),
                           pairs(domin.breed,adjust="none"))
write.list(pairwise.contrasts,file="pairwise.csv")

### age

dominance.age <- Effect(focal.predictors = c("Personality_age"), mod = dominance.model.final,
                       xlevels=list(Personality_age=c(0.2,1,2,3,4,5,6,7,8,9,10,11,12,13,14,1
5,16,17,17.1)),
                       confint=TRUE)
mean.cl <- data.frame(dominance.age$fit,dominance.age$lower,dominance.age$upper)
mean.cl.exp <- exp(mean.cl)
mean.cl.trans <- mean.cl.exp - 1.58

mean.cl.fin <- data.frame(dominance.age$x,mean.cl.exp,mean.cl.trans)
mean.cl.fin

summary(pers.envi.small)

```

```
#### ***** human sociability ####
```

```
human.soc.model.final <- glm(human_sociability_score ~ sex +  
                             Personality_age + breed_group +  
                             ownership_reason + socialization_quantile,  
                             data=pers.envi.small.ed, family=gaussian(link="identity"))
```

```
### anova with f test values
```

```
Anova(human.soc.model.final, type="III", test.statistic="F")
```

```
# glance of results
```

```
plot(allEffects(human.soc.model.final))
```

```
hum.soc.sex <- emmeans(human.soc.model.final, "sex", type="response")
```

```
hum.soc.breed <- emmeans(human.soc.model.final, "breed_group", type="response")
```

```
hum.soc.reason <- emmeans(human.soc.model.final, "ownership_reason", type="response")
```

```
hum.soc.socialization <- emmeans(human.soc.model.final, "socialization_quantile", type="response")
```

```
# pairwise differences
```

```
pairwise.contrasts <- list(pairs(hum.soc.sex,adjust="none"),  
                           pairs(hum.soc.reason,adjust="none"),  
                           pairs(hum.soc.socialization,adjust="none"),  
                           pairs(hum.soc.breed,adjust="none"))
```

```
write.list(pairwise.contrasts,file="pairwise.csv")
```

```
### age
```

```
hum.soc.age <- Effect(focal.predictors = c("Personality_age"), mod = human.soc.model.final,  
                    xlevels=list(Personality_age=c(0.2,1,2,3,4,5,6,7,8,9,10,11,12,13,14,15,16,  
17,17.1)),  
                    confint=TRUE)
```

```
mean.cl <- data.frame(hum.soc.age$x,hum.soc.age$fit,hum.soc.age$lower,hum.soc.age$upper)  
mean.cl
```

```
summary(pers.envi.small)
```

```
#### ***** dog sociability ####
```

```
dog.soc.model.final <- glm(dog_sociability_score ~ sex +  
                             Personality_age + I(Personality_age^2) +  
                             breed_group + socialization_quantile,  
                             data=pers.envi.small.ed, family=gaussian(link="identity"))
```

```
### anova with f test values
```

```
Anova(dog.soc.model.final, type="III", test.statistic="F")
```

```
# glance of results
```

```
plot(allEffects(dog.soc.model.final))
```

```
dog.soc.sex <- emmeans(dog.soc.model.final, "sex", type="response")
```

```

dog.soc.breed <- emmeans(dog.soc.model.final, "breed_group", type="response")
dog.soc.socialization <- emmeans(dog.soc.model.final, "socialization_quantile", type="response")

# pairwise differences
pairwise.contrasts <- list(pairs(dog.soc.sex,adjust="none"),
                           pairs(dog.soc.socialization,adjust="none"),
                           pairs(dog.soc.breed,adjust="none"))
write.list(pairwise.contrasts,file="pairwise.csv")

### age

dog.soc.age <- Effect(focal.predictors = c("Personality_age"), mod = dog.soc.model.final,
                    xlevels=list(Personality_age=c(0.2,1,2,3,4,5,6,7,8,9,10,11,12,13,14,15,16,17,17.1)),
                    confint=TRUE)
mean.cl <- data.frame(dog.soc.age$x,dog.soc.age$fit,dog.soc.age$lower,dog.soc.age$upper)
mean.cl

summary(pers.envi.small)

#### ***** perseverance ####

perseverance.model.final <- glm(perseverance_score ~ sex + Personality_age +
                               I(Personality_age^2) +
                               breed_group + ownership_reason + dogs_acquired,
                               data=pers.envi.small.ed, family=gaussian(link="identity"))

### anova with f test values
Anova(perseverance.model.final, type="III", test.statistic="F")

# glance of results
plot(allEffects(perseverance.model.final))

perseverance.sex <- emmeans(perseverance.model.final, "sex", type="response")
perseverance.breed <- emmeans(perseverance.model.final, "breed_group", type="response")
perseverance.reason <- emmeans(perseverance.model.final, "ownership_reason", type="response")
perseverance.dogs.acquired <- emmeans(perseverance.model.final, "dogs_acquired", type="response")

# pairwise differences
pairwise.contrasts <- list(pairs(perseverance.sex,adjust="none"),
                           pairs(perseverance.reason,adjust="none"),
                           pairs(perseverance.dogs.acquired,adjust="none"),
                           pairs(perseverance.breed,adjust="none"))
write.list(pairwise.contrasts,file="pairwise.csv")

### age

perseverance.age <- Effect(focal.predictors = c("Personality_age"), mod = perseverance.model.final,
                    xlevels=list(Personality_age=c(0.2,1,2,3,4,5,6,7,8,9,10,11,12,13,14,15,16,17,17.1)),

```

```

                                confint=TRUE)
mean.cl <- data.frame(perseverance.age$x,perseverance.age$fit,perseverance.age$lower,persevera
nce.age$upper)
mean.cl

summary(pers.envi.small.ed)
table(pers.envi.small.ed$breed_group)

#### FDR CORRECTION ####

# read in data with p-values
pvalues
head(pvalues)
summary(pvalues)
nrow(pvalues)

# make a vector of all p-values
pvalues.vector <- c(pvalues$Insecurity_p,pvalues$Training_focus_p,
                   pvalues$Energy_p,pvalues$Dominance_p,
                   pvalues$Humsoc_p,pvalues$Dogsoc_p,
                   pvalues$Perseverance_p)
length(pvalues.vector)

# correct all p-values for FDR
pvalues.adj <- p.adjust(pvalues.vector, method = "fdr")

length(pvalues$Insecurity_p)
length(pvalues$Training_focus_p)

# all columns had 1380 rows
# so let's split this vector to vectors of the same length
insecurity.padj <- pvalues.adj[1:1380]
training.padj <- pvalues.adj[1381:2760]
energy.padj <- pvalues.adj[2761:4140]
dominance.padj <- pvalues.adj[4141:5520]
humsoc.padj <- pvalues.adj[5521:6900]
dogsoc.padj <- pvalues.adj[6901:8280]
perseverance.padj <- pvalues.adj[8281:9660]

pvalues.adjusted <- data.frame(pvalues,insecurity.padj,training.padj,
                              energy.padj,dominance.padj,humsoc.padj,
                              dogsoc.padj,perseverance.padj)

summary(pvalues.adjusted)
head(pvalues.adjusted)
write.table(pvalues.adjusted,file="pvalues-adjusted.csv")

#### BREED COMPARISON ####

library(ggplot2)

#### ** insecurity ####
# highest breed: shetland sheepdog
# lowest breed: bull-type terriers
insecurity.breeds <- subset(pers.envi.small, breed_group=="Shetland_Sheepdog" |breed_group=="Bu
ll_type_terriers")
insecurity.breeds$breed_group <- droplevels(insecurity.breeds$breed_group)

```

```

ggplot(insecurity.breeds, aes(x=insecurity_score, fill=breed_group)) +
  geom_density(alpha=0.4)+ theme_minimal() +
  scale_x_continuous(limits=c(-2,4)) +
  scale_fill_manual(values=c("deepskyblue4", "darkgoldenrod"),
                    labels=c("Bull type terriers", "Shetland Sheepdog")) +
  guides(fill = guide_legend(title = "Breed/breed group")) +
  xlab("Insecurity score") + ylab("Density") +
  theme(legend.position = c(0.80,0.85),
        text=element_text(size=20),
        legend.text=element_text(size=14),
        legend.title=element_text(size=17),
        aspect.ratio=0.7)

#### ** training focus ####

# highest breed: other breed
# lowest breed: bull-type terriers

training.breeds <- subset(pers.envi.small, breed_group=="Other_breed"|breed_group=="Bull_type_
terriers")
training.breeds$breed_group <- droplevels(training.breeds$breed_group)
density(training.breeds$training_focus_score)

ggplot(training.breeds, aes(x=training_focus_score, fill=breed_group)) +
  geom_density(alpha=0.4)+ theme_minimal() +
  scale_x_continuous(limits=c(-6,2.5)) +
  scale_fill_manual(values=c("deepskyblue4", "darkgoldenrod"),
                    labels=c("Bull type terriers", "Other breed")) +
  guides(fill = guide_legend(title = "Breed/breed group")) +
  xlab("Training focus score") + ylab("Density") +
  theme(legend.position = c(0.25,0.85),
        text=element_text(size=20),
        legend.text=element_text(size=14),
        legend.title=element_text(size=17),
        aspect.ratio=0.7)

#### ** aggressiveness/dominance ####

# highest breed: fighting dogs
# lowest breed: golden retriever

domi.breeds <- subset(pers.envi.small, breed_group=="Fighting_dogs"|breed_group=="Golden_Retri
ever")
domi.breeds$breed_group <- droplevels(domi.breeds$breed_group)

ggplot(domi.breeds, aes(x=aggressiveness_dominance_score, fill=breed_group)) +
  geom_density(alpha=0.4)+ theme_minimal() +
  scale_x_continuous(limits=c(-2.5,4.5)) +
  scale_fill_manual(values=c("deepskyblue4", "darkgoldenrod"),
                    labels=c("Fighting dogs", "Golden retriever")) +
  guides(fill = guide_legend(title = "Breed/breed group")) +
  xlab("Aggressiveness/dominance score") + ylab("Density") +
  theme(legend.position = c(0.85,0.85),
        text=element_text(size=20),
        legend.text=element_text(size=14),

```

```

    legend.title=element_text(size=17),
    aspect.ratio=0.7)

#### ** energy ####

# highest breed: parson type terriers
# lowest breed: livestock guardian dogs

ggplot(energy.breeds, aes(x=activity_playfulness_score, fill=breed_group)) +
  geom_density(alpha=0.4)+ theme_minimal() +
  scale_x_continuous(limits=c(-4.8,3.1)) +
  scale_fill_manual(values=c("deepskyblue4", "darkgoldenrod"),
                    labels=c("Livestock guardian dogs", "Parson type terriers")) +
  guides(fill = guide_legend(title = "Breed/breed group")) +
  xlab("Energy score") + ylab("Density") +
  theme(legend.position = c(0.25,0.85),
        text=element_text(size=20),
        legend.text=element_text(size=14),
        legend.title=element_text(size=17),
        aspect.ratio=0.7)

#### ** human sociability ####

# highest breed: bull type terriers
# lowest breed: livestock guardian dogs

humsoc.breeds <- subset(pers.envi.small, breed_group=="Bull_type_terriers"|breed_group=="Livestock_guardian_dogs")
humsoc.breeds$breed_group <- droplevels(humsoc.breeds$breed_group)

ggplot(humsoc.breeds, aes(x=human_sociability_score, fill=breed_group)) +
  geom_density(alpha=0.4)+ theme_classic() +
  scale_x_continuous(limits=c(-5.9,2.6)) +
  scale_fill_manual(values=c("deepskyblue4", "darkgoldenrod"),
                    labels=c("Bull type terriers", "Livestock guardian dogs")) +
  guides(fill = guide_legend(title = "Breed/breed group")) +
  xlab("Human sociability score") + ylab("Density") +
  theme(legend.position = c(0.25,0.85),
        text=element_text(size=20),
        legend.text=element_text(size=14),
        legend.title=element_text(size=17),
        aspect.ratio=0.7) +
  geom_vline(data = dummy, aes(xintercept = mean))

#### ** dog sociability ####

# highest breed: finnish lapponian dog
# lowest breed: border collie

dogsoc.breeds <- subset(pers.envi.small, breed_group=="Finnish_Lapphund"|breed_group=="Border_Collie")
dogsoc.breeds$breed_group <- droplevels(dogsoc.breeds$breed_group)

```

```

ggplot(dogsoc.breeds, aes(x=dog_sociability_score, fill=breed_group)) +
  geom_density(alpha=0.4)+ theme_minimal() +
  scale_x_continuous(limits=c(-3.6,2.7)) +
  scale_fill_manual(values=c("deepskyblue4", "darkgoldenrod"),
                    labels=c("Border Collie", "Finnish Lapponian Dog")) +
  guides(fill = guide_legend(title = "Breed/breed group")) +
  xlab("Dog sociability score") + ylab("Density") +
  theme(legend.position = c(0.25,0.85),
        text=element_text(size=20),
        legend.text=element_text(size=14),
        legend.title=element_text(size=17),
        aspect.ratio=0.7)

#### ** perseverance ####

# highest breed: miniature pinscher
# lowest breed: golden retriever

perseverance.breeds <- subset(pers.envi.small, breed_group=="Miniature Pinscher"|breed_group=="Golden Retriever")
perseverance.breeds$breed_group <- droplevels(perseverance.breeds$breed_group)

ggplot(perseverance.breeds, aes(x=perseverance_score, fill=breed_group)) +
  geom_density(alpha=0.4)+ theme_minimal() +
  scale_x_continuous(limits=c(-4.8,4.1)) +
  scale_fill_manual(values=c("deepskyblue4", "darkgoldenrod"),
                    labels=c("Golden Retriever", "Miniature Pinscher")) +
  guides(fill = guide_legend(title = "Breed/breed group")) +
  xlab("Perseverance score") + ylab("Density") +
  theme(legend.position = c(0.25,0.85),
        text=element_text(size=20),
        legend.text=element_text(size=14),
        legend.title=element_text(size=17),
        aspect.ratio=0.7)

#### VARIABLE IMPORTANCE ####

# for calculating relative variable importance
library(vip)

# for calculating cohen's f2 effect sizes
library(effectsize)

# writing out lists
library(erer)

# needed for scores
library(pdp)

#### *** insecurity ####

insecurity.model.final <- glm(insecurity_score_add ~ sex + Personality_age +
                             I(Personality_age^2) +
                             breed_group + socialization_quantile +

```

```

        sterilization_status + dog_experience +
        ownership_reason + hobby_frequency,
        data=pers.envi.small, family=Gamma(link="log"))

insecurity.anova <- Anova(insecurity.model.final, type="III", test.statistic="F")

insecurity.scores <- vi(insecurity.model.final, method = "firm",scale=T)
insecurity.cohen <- cohens_f_squared(insecurity.anova, partial = T)

#### *** training focus ####

training.model.final <- glm(training_focus_score ~ sex + Personality_age +
        I(Personality_age^2) +
        breed_group + hobby_frequency + daily_exercise +
        socialization_quantile + sterilization_status +
        alone_time + dog_experience,
        data=pers.envi.small, family=gaussian(link="identity"))
training.anova <- Anova(training.model.final, type="III", test.statistic="F")

training.scores <- vi(training.model.final, method = "firm",scale=T)
training.cohen <- cohens_f_squared(training.anova, partial = T)

#### *** aggressiveness/dominance ####

dominance.model.final <- glm(aggressiveness_dominance_score_add ~ sex +
        Personality_age + I(Personality_age^2) +
        breed_group + socialization_quantile,
        data=pers.envi.small, family=Gamma(link="log"))
dominance.anova <- Anova(dominance.model.final, type="III", test.statistic="F")

dominance.scores <- vi(dominance.model.final, method = "firm",scale=T)
dominance.cohen <- cohens_f_squared(dominance.anova, partial = T)

#### *** energy ####

energy.model.final <- glm(activity_playfulness_score ~ sex + Personality_age +
        breed_group + hobby_frequency + dogs_acquired,
        data=pers.envi.small, family=gaussian(link="identity"))
energy.anova <- Anova(energy.model.final, type="III", test.statistic="F")

energy.scores <- vi(energy.model.final, method = "firm",scale=T)
energy.cohen <- cohens_f_squared(energy.anova, partial = T)

#### *** human sociability ####

human.soc.model.final <- glm(human_sociability_score ~ sex +
        Personality_age + breed_group +
        ownership_reason + socialization_quantile,
        data=pers.envi.small, family=gaussian(link="identity"))
hum.soc.anova <- Anova(human.soc.model.final, type="III", test.statistic="F")

hum.soc.scores <- vi(human.soc.model.final, method = "firm",scale=T)

```



```

hum.soc.cohen <- cohens_f_squared(hum.soc.anova, partial = T)

#### *** dog sociability ####

dog.soc.model.final <- glm(dog_sociability_score ~ sex +
                          Personality_age + I(Personality_age^2) +
                          breed_group + socialization_quantile,
                          data=pers.envi.small, family=gaussian(link="identity"))
dog.soc.anova <- Anova(dog.soc.model.final, type="III", test.statistic="F")

dog.soc.scores <- vi(dog.soc.model.final, method = "firm",scale=T)
dog.soc.cohen <- cohens_f_squared(dog.soc.anova, partial = T)

#### *** perseverance ####

perseverance.model.final <- glm(perseverance_score ~ sex + Personality_age +
                                I(Personality_age^2) +
                                breed_group + ownership_reason + dogs_acquired,
                                data=pers.envi.small, family=gaussian(link="identity"))
perseverance.anova <- Anova(perseverance.model.final, type="III", test.statistic="F")

perseverance.scores <- vi(perseverance.model.final, method = "firm",scale=T)
perseverance.cohen <- cohens_f_squared(perseverance.anova, partial = T)

#### **** List of all ####

results <- list(insecurity.scores, insecurity.cohen,
               training.scores, training.cohen,
               dominance.scores, dominance.cohen,
               energy.scores,energy.cohen,
               hum.soc.scores, hum.soc.cohen,
               dog.soc.scores, dog.soc.cohen,
               perseverance.scores, perseverance.cohen)
names <- c("insecurity relative", "insecurity cohen's f",
          "training relative", "training cohen's f",
          "dominance relative", "dominance cohen's f",
          "energy relative", "energy cohen's f",
          "hum soc relative", "hum soc cohen's f",
          "dog soc relative", "dog soc cohen's f",
          "perseverance relative", "perseverance cohen's f")
write.list(results,file="effect-sizes.csv", t.name=names)

```
